# Supplementary material for: SUMO monoclonal antibodies vary in sensitivity, specificity, and ability to detect types of SUMO conjugate
Source: PubMed Central journal article supplement (PMC9734647; doi:10.1038/s41598-022-25665-6), 2022-12-09

## Supplemental data, methods and tables

### **SUMO monoclonal antibodies vary in sensitivity, specificity, and ability to detect types of SUMO conjugate.**

Alexander J. Garvin<sup>1\*</sup>, Alexander J. Lanz<sup>1</sup>, Joanna R. Morris<sup>1\*</sup>

1. Birmingham Centre for Genome Biology and Institute of Cancer and Genomic Sciences, College of Medical and Dental Schools, University of Birmingham, B15 2TT, UK.

\* Correspondence; a.j.garvin@bham.ac.uk, j.morris.3@bham.ac.uk

# Supplemental Figure 1

a

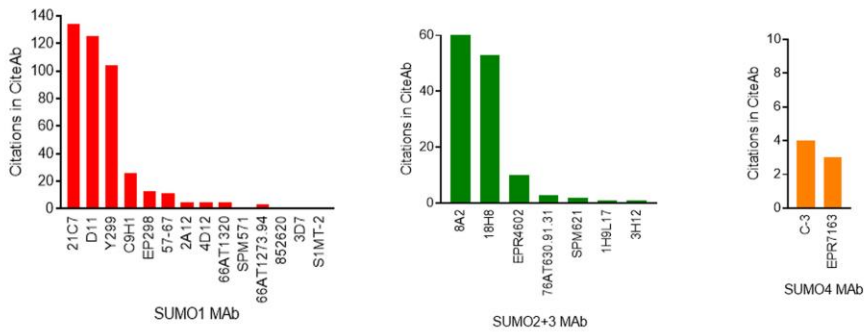

b

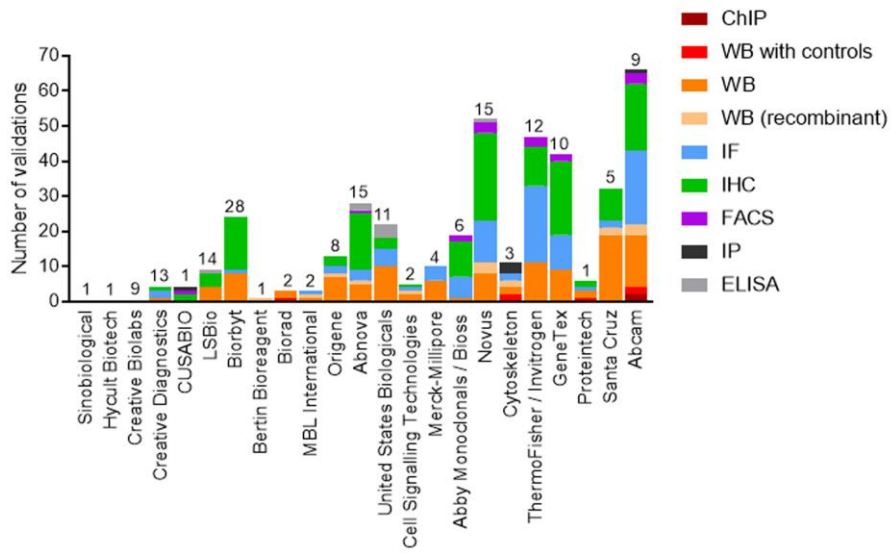

c

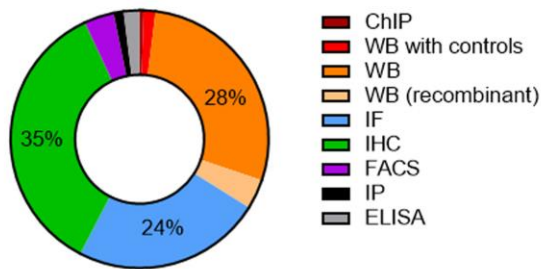

**Supplemental Figure 1. SUMO MABs vary in validation status.**

**a.** Citations for each SUMO MAB from the CiteAb database as of March 2022.

**b.** Total number of validations for SUMO1, SUMO2/3 and SUMO4 MABs ranked by the vendor. The total number of SUMO MABs available per vendor (as of March 2022) is shown above each bar. Validations include any supporting images or data available on the products webpage including those generated by the vendor. Reviews on the product webpage were only included if they contained accompanying images or data. Types of validation are colour coded.

**c.** Type of validation across all SUMO MABs and vendors. Controls include either negative (knockdown or knockout) or positive (over-expression or induced expression with stress). Abbreviations, ChIP (Chromatin Immunoprecipitation), WB (Western blot), recombinant – testing on *E. coli* derived recombinant SUMO proteins, IF (Immunofluorescence), IHC (Immunohistochemistry), FACS (Fluorescence Activated Cell Sorting), IP (Immunoprecipitation), ELISA (enzyme-linked immunosorbent assay).

# Supplemental Figure 2

**a**

|                       |                             |
|-----------------------|-----------------------------|
| SUMO1 Exon 2 siRNA    | CTC AAA GTC ATT GGA CAG GAT |
| SUMO1 NM_003352.8     | CTC AAA GTC ATT GGA CAG GAT |
|                       | L K V I G Q D               |
| SUMO1 siRNA-resistant | CTG AAG GTT ATC GGG CAA GAT |
| SUMO3 Exon 2 siRNA    | GC AAG CTG ATG AAG GCC TA   |
| SUMO3 NM_006936.3     | AGC AAG CTG ATG AAG GCC TAC |
|                       | S K L M K A Y               |
| SUMO3 siRNA-resistant | AGT AAA CTT ATG AAA GCA TAC |

|                       |                                 |
|-----------------------|---------------------------------|
| SUMO4 siRNA #2        | TTT CAA CAG CCT ACG GGA GGT     |
|                       | TTT CAA CAG CCT ACG GGA GGT     |
|                       | F Q Q P T G G                   |
| SUMO4 siRNA-resistant | TTC CAG CAA CCA ACA GGC GGA     |
| SUMO4 siRNA #3        | GA ACA GAC AAA CCT GCA CAG T    |
|                       | GGA ACA GAC AAA CCT GCA CAG TTG |
|                       | G T D K P A Q L                 |
| SUMO4 siRNA-resistant | GGT ACC GAT AAG CCA GC3 CAA TTG |

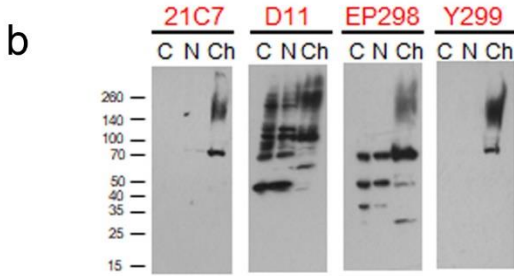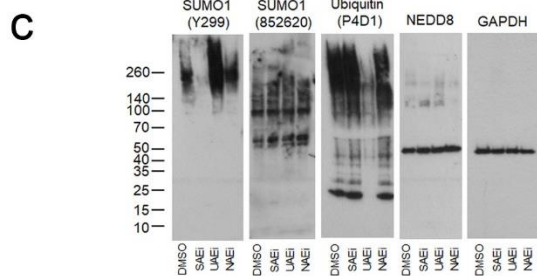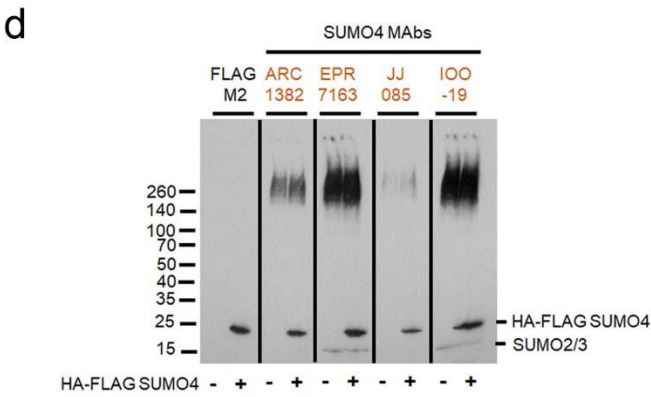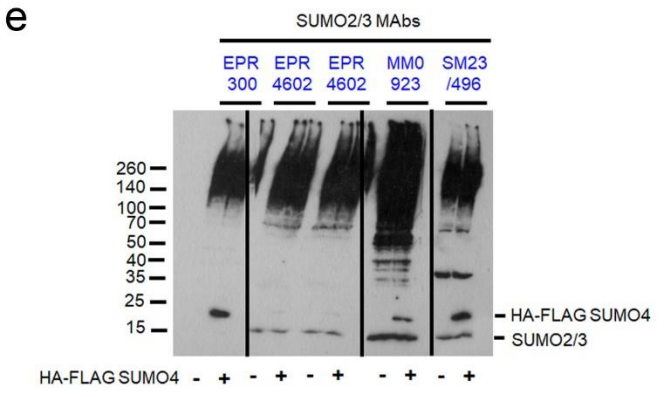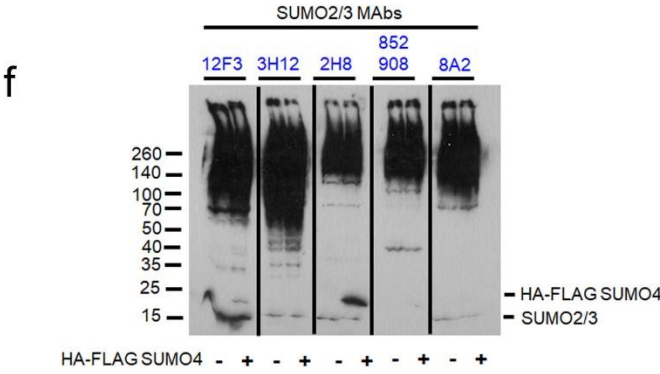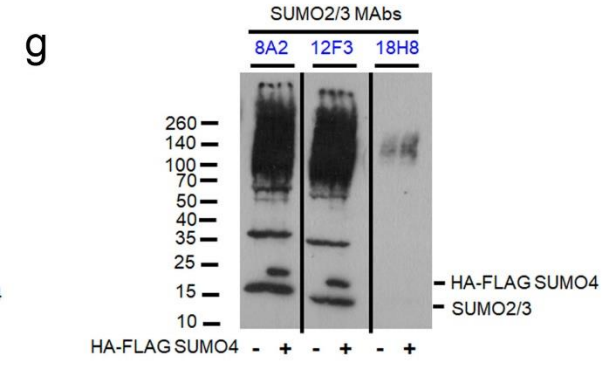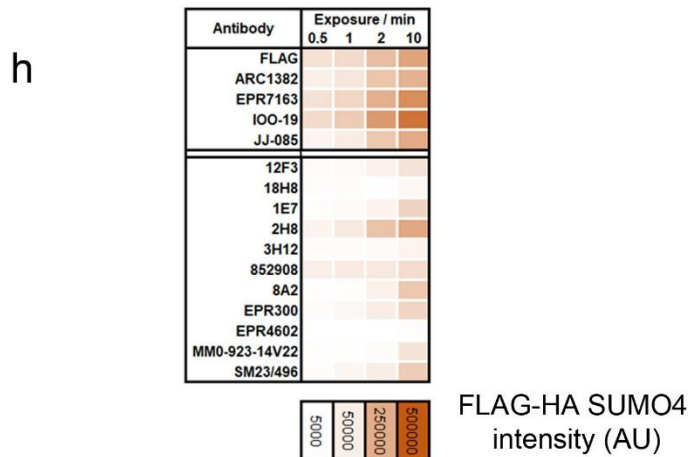

## **Supplemental Figure 2. Non-specific and cross-reactive features of SUMO MABs.**

- a.** Location of synonymous mutations in SUMO1, SUMO3 and SUMO4 cDNA to generate siRNA resistant species.
- b.** U2OS cell lysates separated by fractionation into cytoplasm (C), soluble nuclear (N) or chromatin (Ch) were probed with 21C7 and Y299 control SUMO1 MABs and two SUMO1 MABs that detect non-specific bands (D11 and EP298).
- c.** U2OS treated for six hours with 10  $\mu$ M each of ML-792 (SUMO E1 inhibitor), TAK-243 (Ubiquitin E1 inhibitor) or MLN4924 (NEDD8 E1 inhibitor) prior to lysis (400  $\mu$ L 6X Laemmli buffer / 6 well), separation on 4-20% SDS PAGE gels (20  $\mu$ L / lane) and probed the antibodies shown.
- d, e, and f.** U2OS cells expressing FLAG-HA SUMO4 untreated (-) or doxycycline treated (+) for 48 hours prior to lysis in Laemmli buffer. PVDF membranes divided (indicated by black lines) and probed with indicated MABs but imaged side by side for comparison. Two-minute film exposures shown.
- g.** As for 2d-f but 10-minute exposure shown. 8A2 and 12F3 probed separately but exposed to film with the 18H8 panel are shown for comparison.
- h.** Heat map showing the quantified signal of over-expressed FLAG-HA SUMO4 (band ~ 20 kDa) in U2OS lysates by antibodies raised against SUMO2/3 and 4. Detection by FLAG M2 as an internal control. Intensity is shown across all four film exposure times with deeper orange signifying higher FLAG-HA SUMO4 detection. High molecular weight conjugates and endogenous SUMO2/3/4 (band at ~15 kDa) were not included in the quantification.

# Supplemental Figure 3A

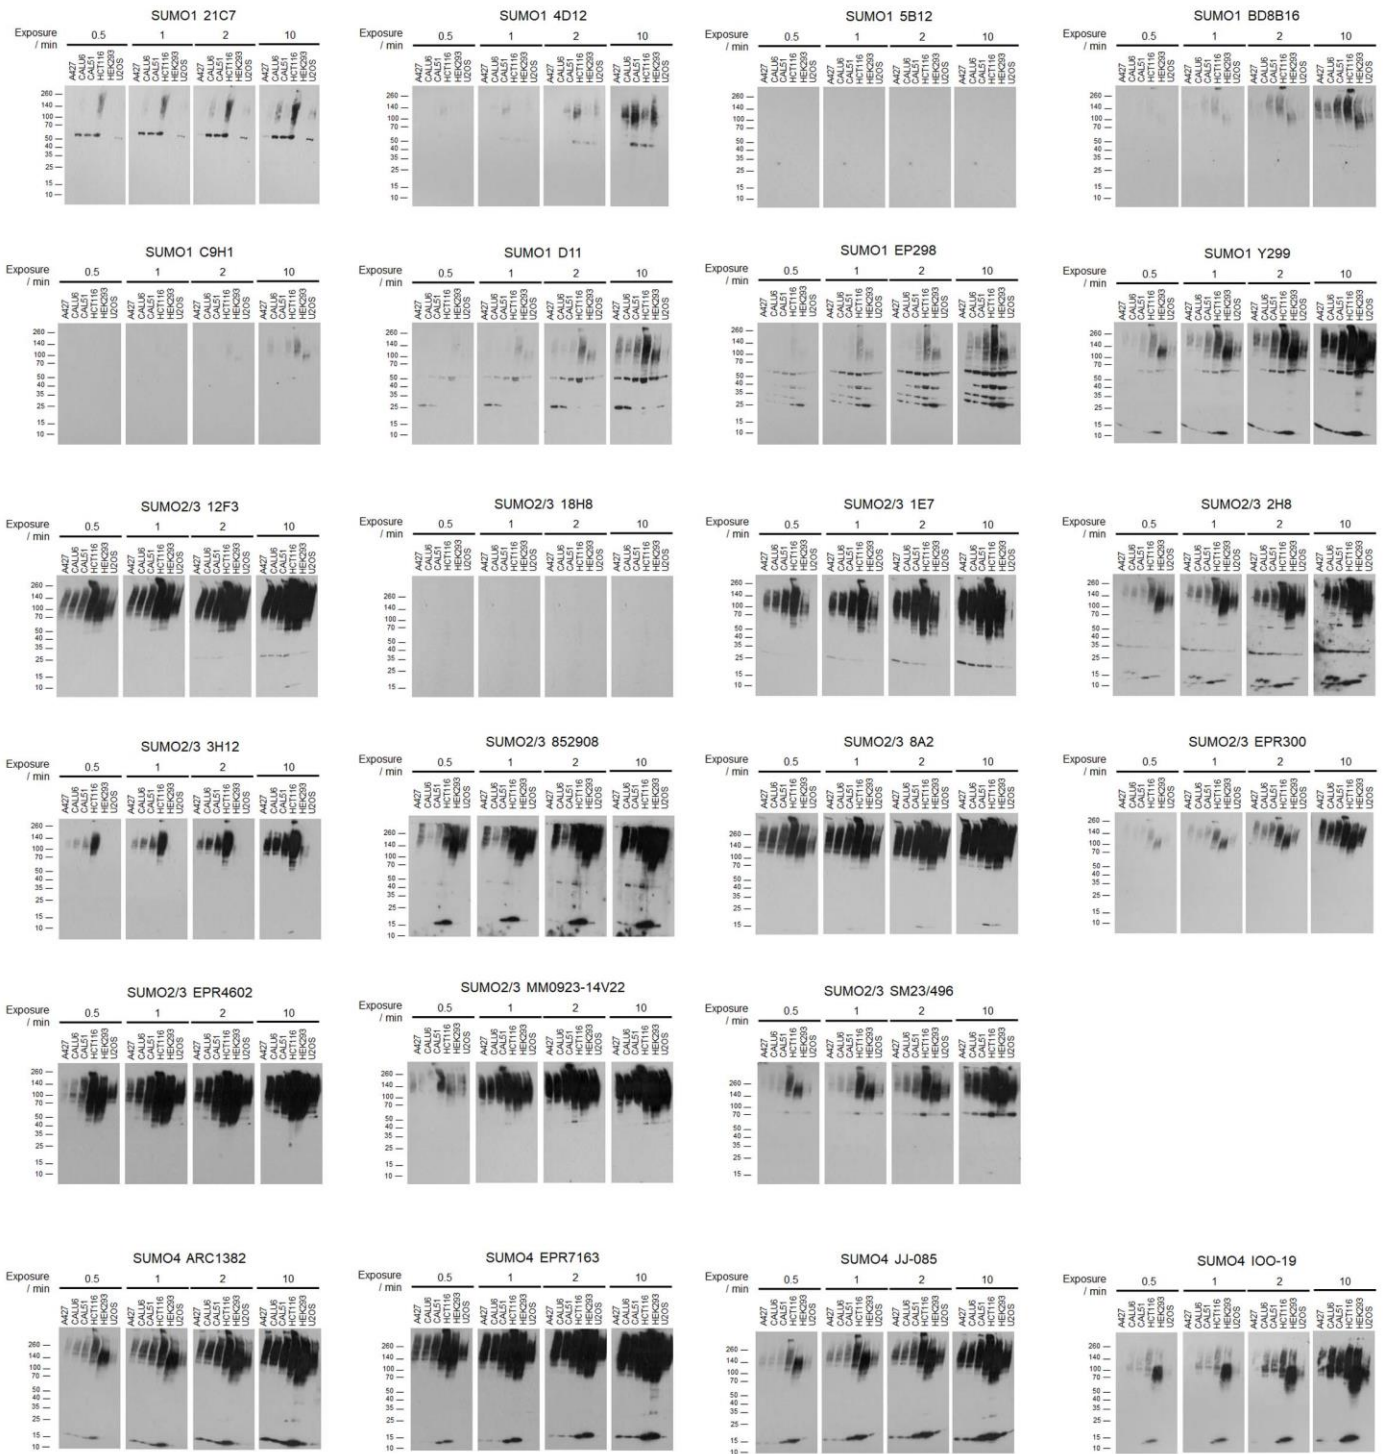

Supplemental Figure 3a. All exposures of immunoblots related to Figure 3a and 3b





# Supplemental Figure 4a

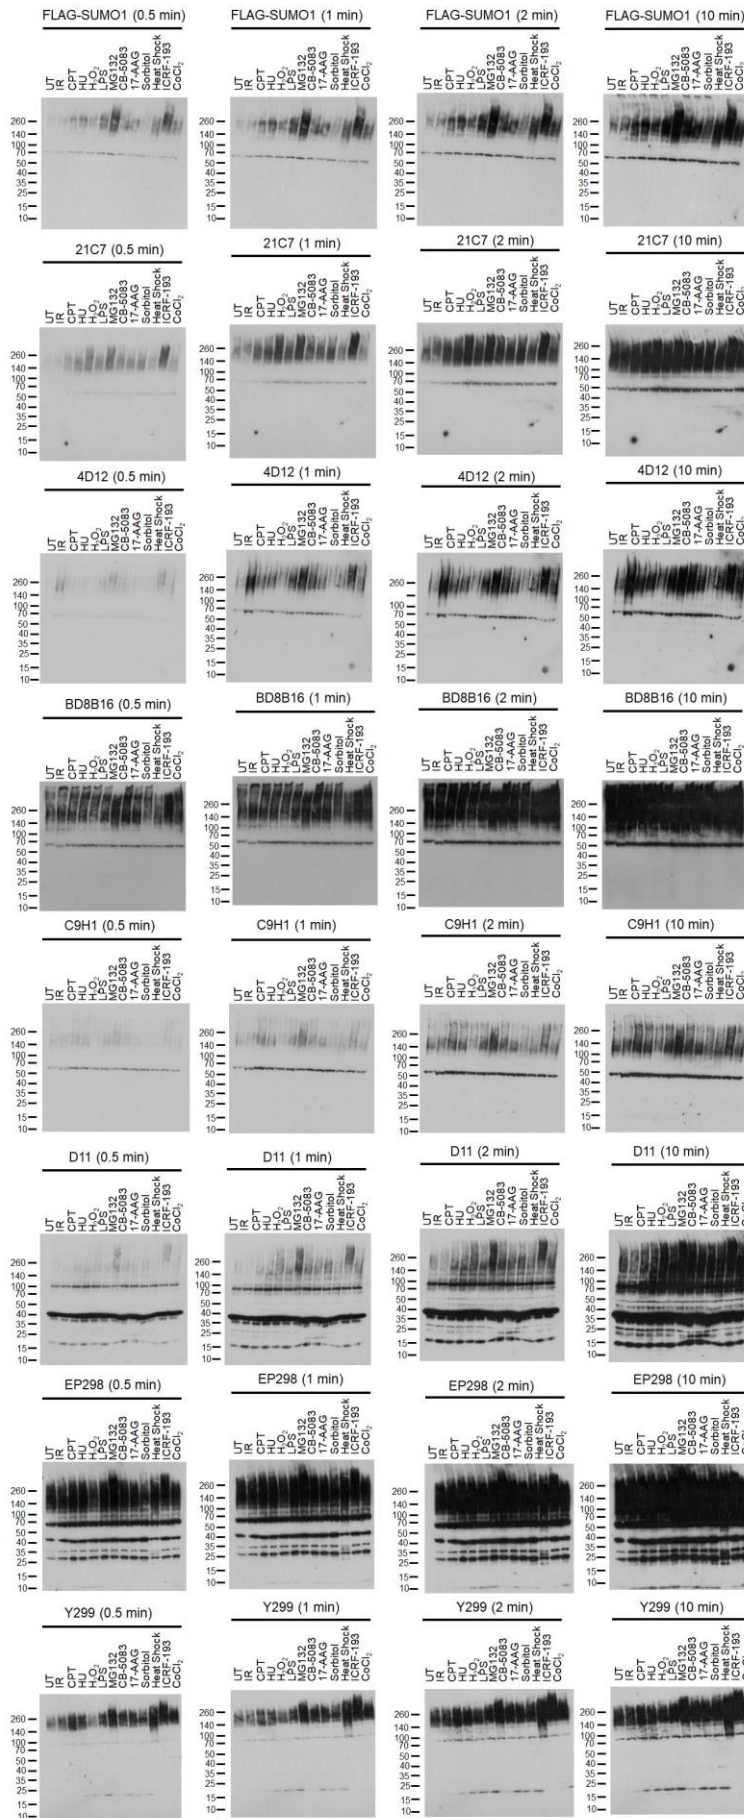

Supplemental Figure 4a. All exposures of SUMO1 immunoblots related to figure 4b.



# Supplemental Figure 4b

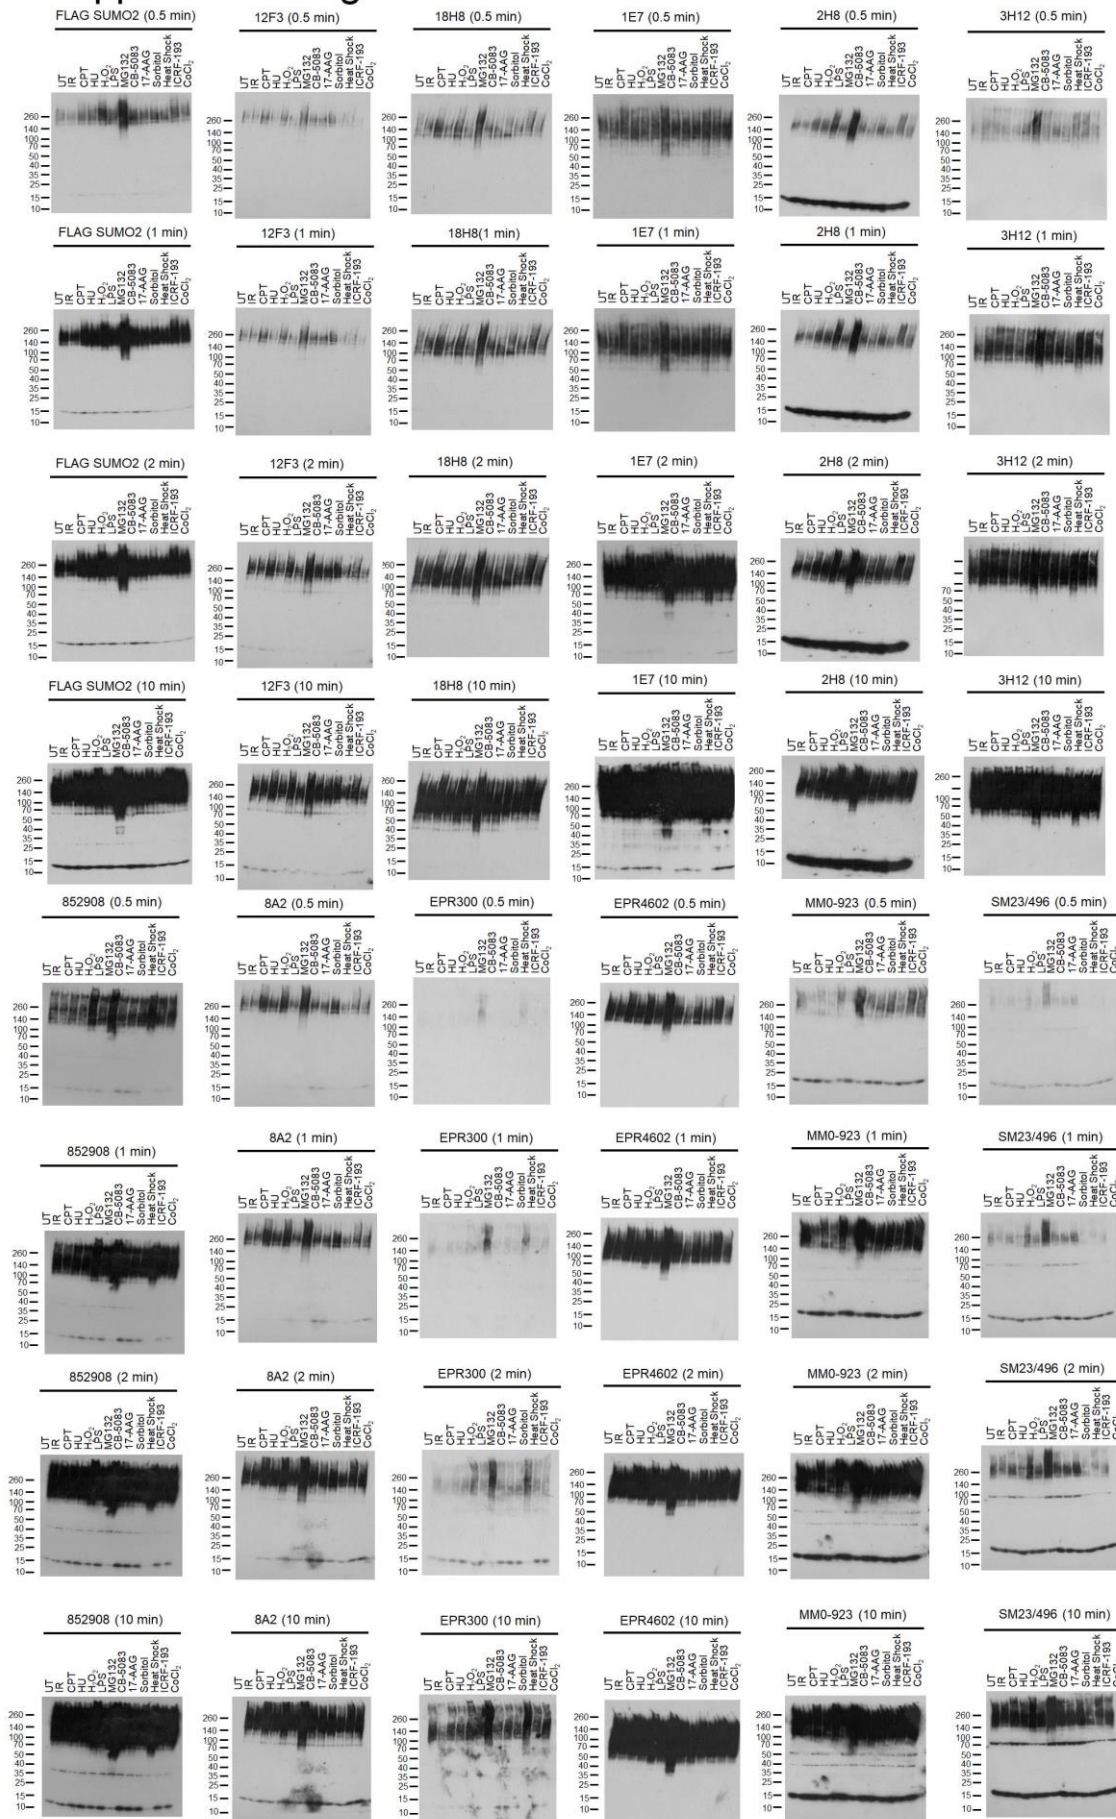

Supplemental Figure 4b. All exposures of SUMO2/3 immunoblot related to Figure 4b.

# Supplemental Figure 4c

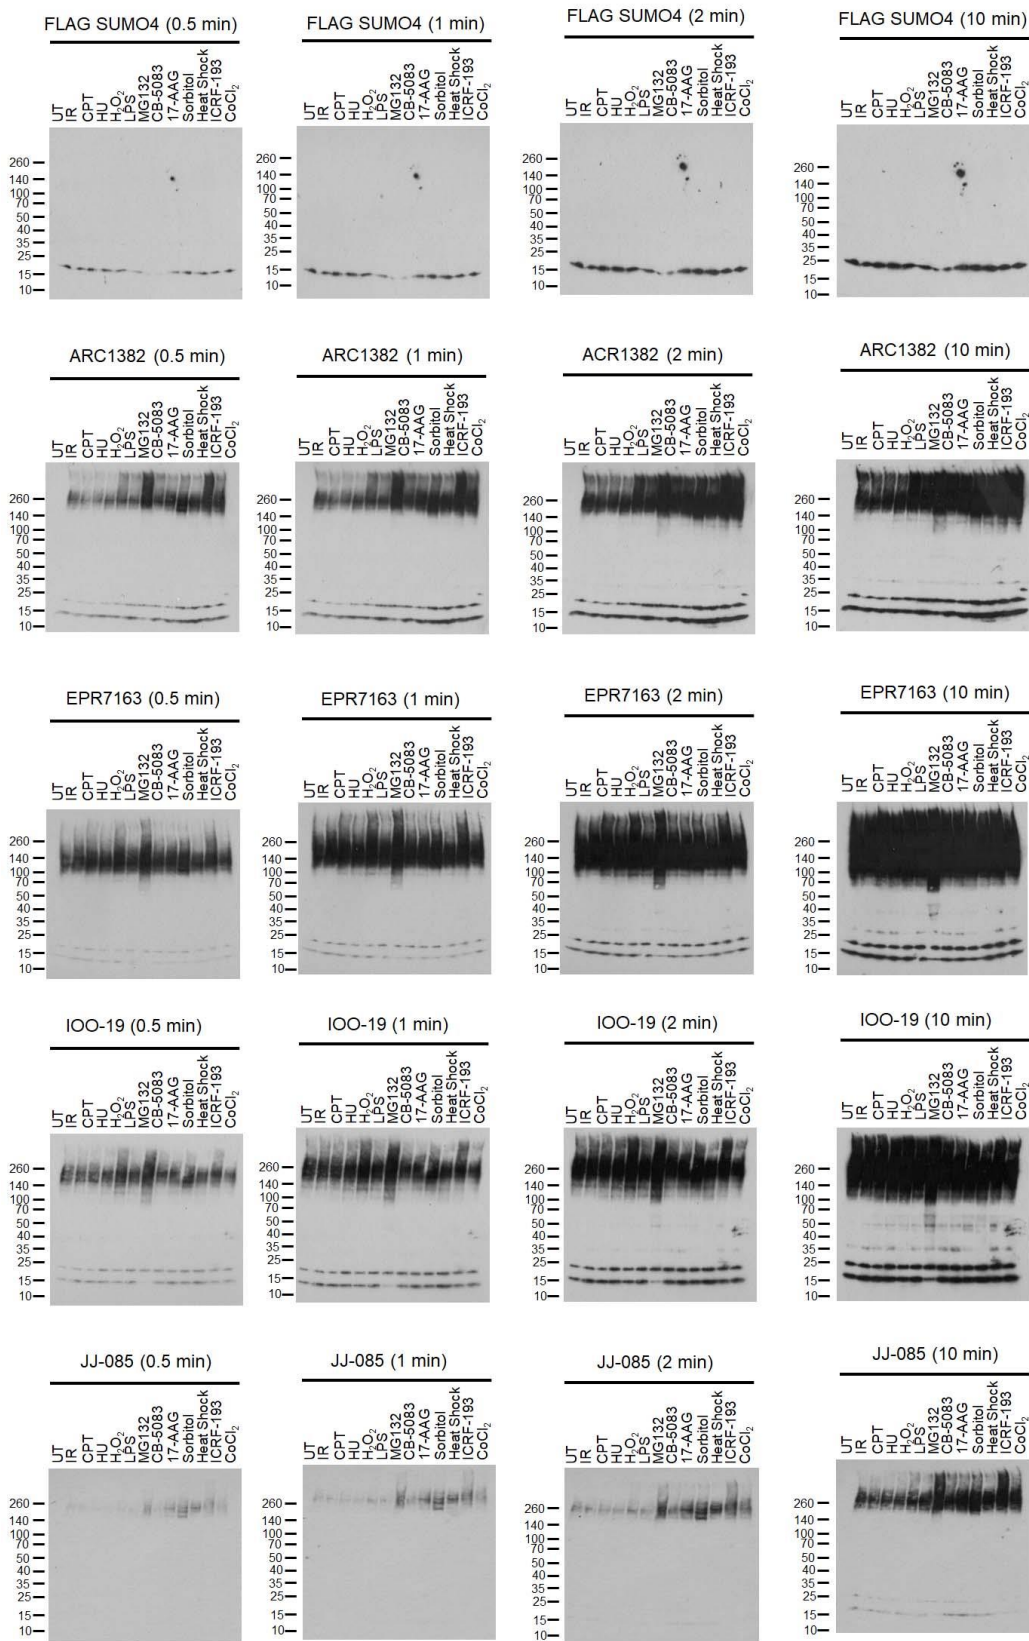

Supplemental Figure 4c. All exposures of SUMO4 immunoblot related to Figure 4d.

## Supplemental Figure 5

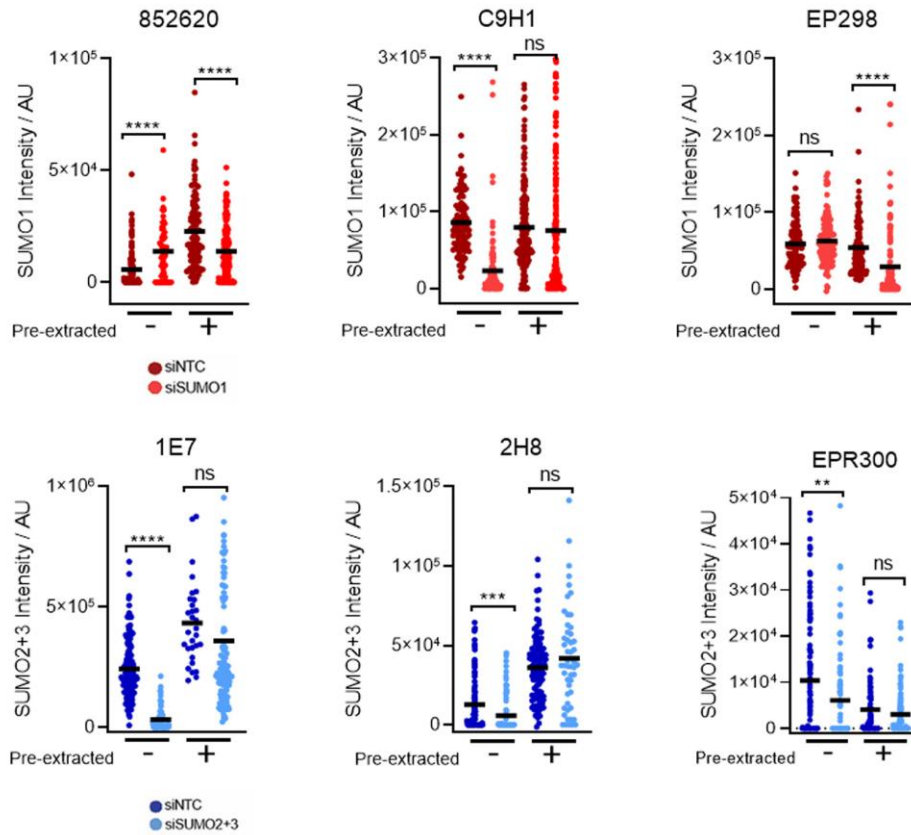

### Supplemental Figure 5. Fixation can affect specificity of SUMO MABs

SUMO immunofluorescent intensity (AU) detected by indicated MABs in U2OS cells (siNTC or siSUMO treated) fixed with PFA prior to Triton X-100 permeabilisation (-) or pre-extracted with CSK buffer prior to fixation (+). Statistical significance by two tailed students t-test is indicated. Ns = not significant. N= ~100 cells per condition.

## Supplemental Tables

**Supplemental Table 1. Commercially available SUMO1, SUMO2/3 and SUMO4 Monoclonal antibodies**

| Clone Name     | Target | Vendor / cat number                  | Host   | Immunogen <sup>1</sup>                 | Isotype | RRID        |
|----------------|--------|--------------------------------------|--------|----------------------------------------|---------|-------------|
| 3              | SUMO1  | Sinobiological (13095-R003)          | Rabbit | rSUMO1 Ser2-Val101                     | IgG     | AB_2786592  |
| 144            | SUMO1  | Creative Diagnostics (CABT-37091MH)  | Mouse  | Not stated                             |         | AB_2357980  |
| 10i67          | SUMO1  | US Biologicals (S0750-01 Mab)        | Mouse  | GST-SUMO1                              | IgG1    |             |
| 1B12-E2        | SUMO1  | Hycult Biotech                       | Mouse  | hSUMO1-Lipoplex O                      | IgG3    |             |
| 1C6            | SUMO1  | Bertin Bioreagent (G01063)           | Mouse  | Ovalbumin conjugated synthetic peptide | IgG2b κ |             |
| 1SUM-1C6       | SUMO1  | Invitrogen (MA3-088)                 | Mouse  | SUMO1 aa 85-97 peptide                 | IgG1κ   | AB_2633333  |
| 19A156         | SUMO1  | US Biologicals (506063 Mab)          | Rabbit | rSUMO1                                 | IgG     |             |
| 21C7           | SUMO1  | DSHB                                 | Mouse  | His-SUMO1                              | IgG2b   | AB_2198257  |
| 2C4A11         | SUMO1  | Westburg                             | Rabbit | hSUMO1 peptide                         |         |             |
| 3D7            | SUMO1  | SIGMA (SAB1402954)                   | Mouse  | GST-SUMO1                              | IgG2ak  | AB_10760295 |
| 3B5B5          | SUMO1  | Proteintech (67559-1-Ig)             | Mouse  | SUMO1 fusion protein Ag29402           | IgG1    | AB_2882773  |
| 4D12           | SUMO1  | Abcam (ab179907)                     | Rat    | GST SUMO1 1-100 Hs FL                  | IgG2ak  | AB_10643976 |
| 5B12           | SUMO1  | MBL International (M113-3)           | Mouse  | rSUMO1 full length                     |         | AB_592768   |
| 5G3            | SUMO1  | CUSABIO (CSB-RA022948A0HU)           | Rabbit | SUMO1 peptide                          | IgG     |             |
| 5D8B16         | SUMO1  | Cytoskeleton (ASM01)                 | Mouse  | rSUMO1                                 | IgG2b   | AB_2884966  |
| 6A4            | SUMO1  | Abby Monoclonals (bsm-51020M)        | Mouse  | GST-SUMO1                              | IgG1    |             |
| 6a183          | SUMO1  | LSBio                                | Mouse  |                                        |         | AB_798992   |
| 66AT1273.94    | SUMO1  | Biorbyt (orb166941)                  | Mouse  | GST-SUMO1                              | IgG1    | AB_10989506 |
| 66AT1273.94.49 | SUMO1  | BIORAD (VMA00306)                    | Mouse  | GST-SUMO1                              | IgG1    |             |
| 66AT1320       | SUMO1  | Biorbyt (orb166942)                  | Mouse  | GST-SUMO1                              | IgG1    | AB_10980242 |
| 76-86          | SUMO1  | DSHB                                 | Mouse  | 76-86 (CIADNHTPKLELG MEEEDVIEVYQEQ T)  | IgG1κ   | AB_2618115  |
| 7H5            | SUMO1  | Abby Monoclonals (bsm-52377R)        | Mouse  | rSUMO1                                 | IgG     |             |
| 852620         | SUMO1  | Novus (A716)                         | Rat    | rSUMO1                                 | IgG2a   | AB_2490530  |
| A13261         | SUMO1  | Antibodies Online (A13261)           | Rabbit | hSUMO1 peptide                         | IgG     |             |
| ARC0215        | SUMO1  | ThermoFisher (MA5-35272)             | Rabbit | hSUMO1 peptide                         | IgG     | AB_2849174  |
| BFI-19         | SUMO1  | Abnova (MAB20757)                    | Rabbit | hSUMO1 peptide                         | IgG     |             |
| C9H1           | SUMO1  | Cell Signalling Technologies (4940S) | Rabbit | hSUMO1 peptide (N terminal)            | IgG     | AB_2302825  |

|            |       |                                    |        |                               |        |             |
|------------|-------|------------------------------------|--------|-------------------------------|--------|-------------|
| CBACN-538  | SUMO1 | Creative Diagnostics (MRO-1452-CN) | Rabbit | rSUMO1                        | IgG    |             |
| D11        | SUMO1 | Santa Cruz Biotechnologies         | Mouse  | rSUMO1                        | IgG3k  | AB_628300   |
| EP298      | SUMO1 | Abcam (ab133352)                   | Rabbit | Synthetic peptide             | IgG    | AB_2240112  |
| FQ309      | SUMO1 | Creative Diagnostics (DCABH-2692)  | Rabbit | Synthetic peptide             |        |             |
| GT1098     | SUMO1 | GeneTex (GT1098)                   | Rabbit | Not stated                    | IgG    |             |
| opof       | SUMO1 | Creative Biolabs (MOB-1981CT)      | Mouse  | Not stated                    | IgG3   |             |
| OTI2B3     | SUMO1 | Invitrogen (TA811053)              | Mouse  | rSUMO1                        | IgG2b  |             |
| OTI1E8     | SUMO1 | Invitrogen (TA811055)              | Mouse  | rSUMO1                        | IgG1   |             |
| S1-MT-2    | SUMO1 | NSJ Bioreagents (V7067)            | Mouse  | rSUMO1                        | IgG1k  |             |
| S10G1      | SUMO1 | Bioss (bsm-51457M)                 | Mouse  | GST-SUMO1                     | IgG1   |             |
| SJ20-03    | SUMO1 | Novus (NBP2-67419)                 | Rabbit | rSUMO1                        | IgG    |             |
| SM1/495    | SUMO1 | Biorbyt (orb388767)                | Mouse  | rSUMO1                        | IgG1k  |             |
| SPM571     | SUMO1 | Biorbyt (orb388768)                | Mouse  | rSUMO1                        | IgG1   |             |
| SUMO1/1188 | SUMO1 | Biorbyt (orb388769)                | Mouse  | rSUMO1                        | IgG1k  |             |
| T.243.0    | SUMO1 | Invitrogen (MA5-14877)             | Rabbit | hSUMO1 peptide (N terminal)   | IgG    | AB_10979860 |
| TK31-14    | SUMO1 | Creative Diagnostics (CABT-L626)   | Rabbit | rSUMO1                        | IgG    |             |
| U.354.0    | SUMO1 | Creative Diagnostics (CABT-L1615)  | Rabbit | N terminal peptide            | IgG    |             |
| Y299       | SUMO1 | Abcam (ab32058)                    | Rabbit | C terminal peptide            | IgG    |             |
|            |       |                                    |        |                               |        |             |
| 1E7        | SUMO2 | MBL International (M114-3)         | Mouse  | rSUMO2                        | IgG2b  |             |
| 084DU9.2.2 | SUMO2 | Creative Diagnostics (DCABY-1339)  | Mouse  | C terminal peptide            | IgG2b  |             |
| 12F3       | SUMO2 | Cytoskeleton                       | Mouse  | rSUMO2 +CQIRFRFDGQPI NE       | IgG    |             |
| 13H363     | SUMO2 | US Biologicals                     | Mouse  | rSUMO2                        | IgG2bk |             |
| 16C92      | SUMO2 | US Biologicals                     | Mouse  | rSUMO2 1-93                   | IgG2bk |             |
| 2C7-1A11   | SUMO2 | Abnova (H00006613-M02)             | Mouse  | GST-SUMO2                     | IgG1k  |             |
| 2H8        | SUMO2 | Abnova (H00006613-M06)             | Mouse  | GST-SUMO2                     | IgG    |             |
| 3H12       | SUMO2 | Abcam (ab191492)                   | Rat    | SUMO2 1-92                    | IgG    |             |
| 8A2        | SUMO2 | DSHB                               | Mouse  | rSUMO2                        | IgG2b  |             |
| 973CT8-1-1 | SUMO2 | Biorbyt (orb134982)                | Mouse  | His-SUMO2 C terminus          | IgG2b  |             |
| 9B3        | SUMO2 | Creative Diagnostics (DCABH-10002) | Mouse  | rSUMO2                        | IgG    |             |
| ARC1186    | SUMO2 | Abnova (MAB22897)                  | Rabbit | Synthetic peptide human SUMO2 | IgG    | AB_2849531  |
| AT10F1     | SUMO2 | Abcam (ab104123)                   | Mouse  | SUMO2 1-93                    | IgG2bk |             |
| BU21G2     | SUMO2 | Creative Diagnostics (DCABH-33)    | Mouse  | rSUMO2 aa 1-93                | IgG2b  |             |



|               |         |                                      |        |                                            |        |             |
|---------------|---------|--------------------------------------|--------|--------------------------------------------|--------|-------------|
| EPR300        | SUMO2   | Abcam (ab109196)                     | Rabbit | SUMO2 peptide                              | IgG    |             |
| EPR4602       | SUMO2   | Abcam (ab109005)                     | Rabbit | SUMO2 peptide                              | IgG    |             |
| KK198-15      | SUMO2   | Creative Diagnostics (CABT-L819)     | Rabbit | rSUMO2                                     |        |             |
| S23MT-1       | SUMO2   | Biorbyt (orb56418)                   | Mouse  | rSUMO2                                     | IgG1k  |             |
| SM23/496      | SUMO2   | Abcam (ab190757)                     | Mouse  | rSUMO2                                     | IgG1k  |             |
| SPM572        | SUMO2   | Biorbyt (orb388658)                  | Mouse  | rSUMO2                                     | IgG1k  |             |
| SPM621        | SUMO2   | Biorbyt (orb56184)                   | Mouse  | rSUMO2                                     | IgG1k  |             |
| SUMO2/1199    | SUMO2   | Biorbyt (orb388659)                  | Mouse  | rSUMO2                                     | IgG1k  |             |
|               |         |                                      |        |                                            |        |             |
| 401504        | SUMO3   | R & D Systems (A-724)                | Rat    | rSUMO3 1-103                               | IgG1   |             |
| 852908        | SUMO3   | R & D Systems (A-718)                | Rat    | rSUMO3                                     | IgG2a  |             |
| 907614        | SUMO3   | Adipogen (907614)                    | Rat    | SUMO3 peptide                              | IgG2a  |             |
| 18H8          | SUMO3   | Cell Signalling Technologies (4971S) | Rabbit | N terminal peptide                         | IgG    |             |
| 1H9L17        | SUMO3   | Invitrogen (700186)                  | Rabbit | SUMO3 peptide 91-103                       | IgG    |             |
| 2I0M28        | SUMO3   | Creative Diagnostics (CABT-L1617)    | Rabbit | SUMO3 peptide 91-103                       | IgG    |             |
| 4B9           | SUMO3   | Abnova                               | Mouse  | GST-SUMO3 (partial)                        | IgG2bk |             |
| 4G11          | SUMO3   | Sigma Aldrich (SAB1400264)           | Mouse  | GST-SUMO3 (partial)                        | IgG2ak |             |
| 76AT630.91.31 | SUMO3   | Invitrogen (MA5-11148)               | Mouse  | GST-SUMO3                                  | IgG1   |             |
| J.778.2       | SUMO3   | Invitrogen (MA5-14951)               | Mouse  | SUMO3 peptide                              | IgG    | AB_10979052 |
| K.889.3       | SUMO3   | Creative Diagnostics (CABT-L1616)    | Rabbit | N terminal peptide                         | IgG    |             |
| LW-M2         | SUMO3   | Santa Cruz (sc-135572)               | Mouse  | rSUMO3                                     | IgG2ak |             |
| MM0923-14V22  | SUMO3   | Abcam (ab201594)                     | Rat    | rSUMO3 1-103                               | IgG2   |             |
| S3G2          | SUMO3   | Bioss (bsm-51458M)                   | Mouse  | GST-SUMO3                                  | IgG1   |             |
|               |         |                                      |        |                                            |        |             |
| 1A1B3         | SUMO2/3 | Proteintech (67154-1-Ig)             | Mouse  | SUMO2/3 fusion protein Ag28672             | IgG2b  |             |
| 7G10          | SUMO2/3 | Bioss (bsm-52716R)                   | Rabbit | C terminal SUMO2+3                         | IgG    |             |
| IBG-19        | SUMO2/3 | Abnova (MAB20758)                    | Rabbit | Peptide corresponding to human SUMO2/SUMO3 | IgG    |             |
| JJ-087-04     | SUMO2/3 | ThermoFisher (MA5-32427)             | Rabbit | C terminus of SUMO2+3                      | IgG    | AB_2809705  |
|               |         |                                      |        |                                            |        |             |
| 2E4           | SUMO4   | Creative Diagnostics (DCABH-13669)   | Mouse  | GST-SUMO4 NP_001002255.1                   | IgG2a  |             |
| 3C3           | SUMO4   | Bioss (bsm-52767R)                   | Mouse  | rSUMO4 1-100                               | IgG    |             |
| 9H10-e        | SUMO4   | Kerafast (EFH003)                    | Mouse  | rSUMO4                                     |        |             |
| ARC1382       | SUMO4   | Invitrogen (MA5-35745)               | Rabbit | SUMO4 peptide                              | IgG    | AB_2849645  |



|          |          |                                  |        |               |       |            |
|----------|----------|----------------------------------|--------|---------------|-------|------------|
| C3       | SUMO4    | Santa Cruz (sc-393144)           | Mouse  | rSUMO4 1-95   | IgG   |            |
| EPR7163  | SUMO4    | Abcam (ab232032)                 | Rabbit | SUMO4 peptide | IgG   |            |
| IOO-19   | SUMO4    | Abnova (MAB20759)                | Rabbit | SUMO4 peptide | IgG   |            |
| JJ-085   | SUMO4    | Abnova (MA5-32478)               | Rabbit | rSUMO4 1-100  | IgG   | AB_2809755 |
| KK196-12 | SUMO4    | Creative Diagnostics (CABT-L851) | Rabbit | rSUMO4        | IgG   |            |
|          |          |                                  |        |               |       |            |
| 852721   | Pan SUMO | R&D (A-714)                      | Rat    | rSUMO2        | IgG2a |            |
|          |          |                                  |        |               |       |            |

## 1. Abbreviations

**hSUMO**; immunogen is derived from a human SUMO protein sequence, but no other information is stated on the datasheet.

**rSUMO**; recombinant / bacterially derived SUMO proteins, the N terminal tag is not stated.

**GST-SUMO**; Glutathione-S-transferase N terminally fused SUMO proteins, presumably recombinant.

**His-SUMO**; Histidine tagged N terminally fused SUMO proteins, presumably recombinant.

**Supplemental Table 2. Plasmids**

| <b>Plasmid Name</b>                  | <b>Source</b>          |
|--------------------------------------|------------------------|
| pCDNA5/FRT/TO<br>6XHis-FLAG SUMO1 WT | This paper / GenScript |
| pCDNA5/FRT/TO<br>6XHis-FLAG SUMO2 WT | This paper / GenScript |
| pCDNA5/FRT/TO<br>6XHis-FLAG SUMO3 WT | This paper / GenScript |
| pCDNA5/FRT/TO<br>FLAG-HA SUMO4 WT    | This paper / GenScript |
| pCDNA5/FRT/TO<br>FLAG-HA SUMO4 M55V  | This paper / GenScript |
| pGEX-4T1 ProSUMO1                    | This paper / GenScript |
| pGEX-4T1 SUMO1 WT                    | This paper / GenScript |
| pGEX-4T1 ProSUMO2                    | This paper / GenScript |
| pGEX-4T1 SUMO2 WT                    | This paper / GenScript |
| pGEX-4T1 ProSUMO3                    | This paper / GenScript |
| pGEX-4T1 SUMO3 WT                    | This paper / GenScript |
| pGEX-6P1 SUMO4 WT                    | This paper / GenScript |
| pGEX-6P1 SUMO4 M55V                  | This paper / GenScript |

**Supplemental Table 3. Antibodies**

| <b>Antibody</b>                                  | <b>Catalogue number</b> | <b>Supplier</b>                | <b>Lot number</b> | <b>Concentration / Use</b> |
|--------------------------------------------------|-------------------------|--------------------------------|-------------------|----------------------------|
| FLAG (Gt)                                        | ab1257                  | Abcam                          | GR225879-35       | 1:1000 (WB)                |
| FLAG M2 (Ms)                                     | F1804                   | Sigma                          | SLCC6485          | 1:2000 (WB, IF)            |
| GAPDH 6C5 (Ms)                                   | CB1001                  | Calbiochem                     | 3725987           | 1:5000 (WB)                |
| HA.11 (Ms)                                       | 901501                  | Biologend                      | B272772           | 1:1000 (WB, IF)            |
| KAP1 (Ms)                                        | NB100-47549             | Novus                          | VK307456          | 1:1000 (WB)                |
| NEDD8 (Ms)                                       | sc-373741               | Santa Cruz                     | J2816             | 1:200 (WB)                 |
| PML C7 (Ms)                                      | ab96051                 | Abcam                          | GR3284434-1       | 1:1000 (IF)                |
| PML (Rb)                                         | PA5-79835               | Invitrogen                     | VL31407955        | 1:1000 (IF)                |
| RANGAP1 (Rb)                                     | 36067S                  | CST                            | LOT1              | 1:1000 (WB)                |
| RNF4 (Goat)                                      | AF7964                  | R&D                            | CIRA0217091       | 1:250 (WB)                 |
| SENP6 (Rb)                                       | HPA024376               | Merck                          | A106728           | 1:1000 (WB)                |
| SUMO1 Y299 (Rb)                                  | ab32058                 | Abcam                          | GR3244068-3       | 1:1000 (WB, IF)            |
| SUMO1 4D12 (Rat)                                 | MABS1223                | Millipore                      | 3540377           | 1:500 (WB, IF)             |
| SUMO1 EP298 (Rb)                                 | ab133352                | Abcam                          | GR268526-10       | 1:1000 (WB, IF)            |
| SUMO1 5B12 (Ms)                                  | M113-3                  | MBL                            | LOT-10            | 1:1000 (WB, IF)            |
| SUMO1 D11 (Ms)                                   | sc-9060                 | Santa Cruz                     | A2021             | 1:200 (WB, IF)             |
| SUMO1 852620 (Rat)                               | A-716                   | R&D Systems                    | 02263914          | 1:500 (WB, IF)             |
| SUMO1 5D8B16 (Ms)                                | ASM01                   | Cytoskeleton                   | LOT 3             | 1:1000 (WB, IF)            |
| SUMO1 C9H1 (Rb)                                  | 4940S                   | CST                            | LOT 7             | 1:1000 (WB, IF)            |
| SUMO1 21C7 (Ms)                                  | 33-2411                 | Invitrogen                     | WE326808          | 1:500 (WB, IF)             |
| SUMO2/3 8A2 (Ms)                                 | ab81371                 | Abcam                          | GR3233360-1       | 1:1000 (WB, IF)            |
| SUMO2/3 EPR4602 (Rb)                             | ab109005                | Abcam                          | GR154070-1        | 1:1000 (WB, IF)            |
| SUMO2/3 3H12 (Rat)                               | ab191492                | Abcam                          | GR274848-4        | 1:1000 (WB, IF)            |
| SUMO2/3 SM23/496 (Ms)                            | ab190757                | Abcam                          | GR244998-1        | 1:200 (WB, IF)             |
| SUMO2/3 852908 (Rat)                             | A-718                   | R&D Systems                    | 28464016          | 1:500 (WB, IF)             |
| SUMO2/3 2H8 (Ms)                                 | SAB1402359              | Sigma                          | 11238-2H8         | 1:500 (WB, IF)             |
| SUMO2/3 12F3 (Ms)                                | ASM23                   | Cytoskeleton                   | LOT 11            | 1:1000 (WB, IF)            |
| SUMO2/3 18H8 (Rb)                                | 4971S                   | CST                            | LOT 7             | 1:1000 (WB, IF)            |
| SUMO2/3 IE7 (Ms)                                 | M114-3                  | MBL                            | LOT 28            | 1:1000 (WB, IF)            |
| SUMO2/3 EPR300 (Rb)                              | ab109196                | Abcam                          | GR96828-9         | 1:1000 (WB, IF)            |
| SUMO2/3 MM0923-14V22 (Rat)                       | ab201594                | Abcam                          | GR3247400-1       | 1:200 (WB, IF)             |
| SUMO4 EPR7163 (Rb)                               | ab126606                | Abcam                          | GR155829-1        | 1:1000 (WB, IF)            |
| SUMO4 JJ085-01 (Rb)                              | MA5-32478               | Invitrogen                     | WC32 16805        | 1:1000 (WB, IF)            |
| SUMO4 ARC1382 (Rb)                               | MA535745                | Life Technologies              | WC3224343A        | 1:1000 (WB, IF)            |
| SUMO4 IOO-19 (Rb)                                | M06740                  | Boster Biological Technologies | BS21031540        | 1:1000 (WB, IF)            |
| Ubiquitin P4D1 (Ms)                              | sc-8017                 | Santa Cruz                     | F2320             | 1:200 (WB)                 |
|                                                  |                         |                                |                   |                            |
| Donkey anti-mouse-488 AF                         | A21202                  | Invitrogen                     |                   | 1:2000 (IF)                |
| Donkey anti-rabbit-488 AF                        | A21206                  | Invitrogen                     |                   | 1:2000 (IF)                |
| Donkey anti-mouse-555 AF                         | A31570                  | Invitrogen                     |                   | 1:2000 (IF)                |
| Donkey anti-rabbit-555 AF                        | A31572                  | Invitrogen                     |                   | 1:2000 (IF)                |
| Polyclonal Swine Anti-Rabbit Immunoglobulins/HRP | P021702-2               | Agilent Technologies           |                   | 1:5000 (WB)                |
| Goat anti Rat HRP                                | AP136P                  | Merck                          |                   | 1:5000 (WB)                |
| Polyclonal Rabbit Anti-Mouse Immunoglobulins/HRP | P0161                   | Agilent Technologies           |                   | 1:5000 (WB)                |

**Supplemental Table 4. Oligonucleotides and Peptides**

| Oligonucleotide | Sequence (5'-3') Sense – anti Sense                                   |
|-----------------|-----------------------------------------------------------------------|
| siNTC           | CUUACGCUGAGUACUUCGA[dT][dT]<br>[Phos]UCGAAGUACUCAGCGUAAG[dT][dT]      |
| siSUMO1 Exon 2  | CUCAAAGUCAUUGGACAGGAU[dT][dT]<br>[Phos]AUCCUGUCCAAUGACUUUGAG[dT][dT]  |
| siSUMO1 UTR     | CCUUCAUAUUACCCUCUCCUU[dT][dT]<br>[Phos]AAGGAGAGGGUAAUAUGAAGG[dT][dT]  |
| siSUMO2 UTR A   | GUACGUAGCUGUUACAUGU[dT][dT]<br>[Phos]ACAUGUAAACAGCUACGUAC[dT][dT]     |
| siSUMO2 UTR B   | GCGUCUUGUUGUUUAAAUA[dT][dT]<br>[Phos]UAUUUAAACAACAAGACGC[dT][dT]      |
| siSUMO3 Exon 2  | GCAAGCUGAUGAAGGCCUA[dT][dT]<br>[Phos]UAGGCCUUCAUCAGCUUGC[dT][dT]      |
| siSUMO3 UTR     | GGGAUGAAUCUGUAAACUUA[dT][dT]<br>[Phos]UAAGUUACAGAUUCAUCCC[dT][dT]     |
| siSUMO4 A       | ACCUCCCGUAGGCUGUUGAAA[dT][dT]<br>[Phos]UUUCAACAGCCUACGGGAAGGU[dT][dT] |
| siSUMO4 B       | ACUGUGCAGGUUUGUCUGUUC[dT][dT]<br>[Phos]GAACAGACAAACCUGCACAGU[dT][dT]  |
| siSENP6         | CACAGGAUUAACAACCAAGAA[dT][dT]<br>[Phos]UUCUUGGUUGUUAUCCUGUG[dT][dT]   |
| siRNF4 Exon 11  | [Phos]AACGAUGAGACGUCCAUUC[dT][dT]<br>GAAUGGACGUCUCAUCGUU[dT][dT]      |
| siRNF4 Exon 9   | [Phos]UCACAUAUACGUCUCUGUC[dT][dT]<br>GACAGAGACGUUAUUGUGA[dT][dT]      |
| <b>Peptides</b> |                                                                       |
| SUMO1 # 1       | MSDQEAKPSTEDLGDKKEGE                                                  |
| SUMO1 # 2       | EGEYIKLKVIGQDSSEIHFK                                                  |
| SUMO1 # 3       | HFVKMTTHLKKLKESYCQR                                                   |
| SUMO1 # 4       | CQRQGVPMNSLRFLFEGQRI                                                  |
| SUMO1 # 5       | QRIADNHTPKELGMEEEDVI                                                  |
| SUMO1 # 6       | DVIEVYQEQTGGHSTV                                                      |
| SUMO2 # 1       | MADEKPKEGVKTENNDHINL                                                  |
| SUMO2 # 2       | INLKVAGQDGSVVQFKIKRH                                                  |
| SUMO2 # 3       | KRHTPLSKLMKAYCERQGLS                                                  |
| SUMO2 # 4       | GLSMRQIRFRFDGQPINETD                                                  |
| SUMO2 # 5       | ETDTPAQLEMEDEDTIDVFQQQTGGVY                                           |
| SUMO4 # 1       | MANEKPTEEVTENNNHINL                                                   |
| SUMO4 # 2       | INLKVAGQDGSVVQFKIKRQ                                                  |
| SUMO4 # 3       | KRQTPLSKLMKAYCEPRGLS                                                  |
| SUMO4 # 4       | GLSMKQIRFRFGQPISGTD                                                   |
| SUMO4 # 5       | GTDKPAQLEMEDEDTIDVFQQPTGGVY                                           |

**Supplemental Table 5. Cell lines**

| <b>Cell line / Supplier</b>                           | <b>Growth conditions</b>                                                | <b>RRID</b> |
|-------------------------------------------------------|-------------------------------------------------------------------------|-------------|
| U2OS FlpIn (Grant Stewarts, University of Birmingham) | DMEM, 10% FBS, 1% Penicillin/Streptomycin                               | N/A         |
| U2OS FlpIn 6xHis-FLAG SUMO1 WT (This study)           | DMEM, 10% FBS, 1% Penicillin/Streptomycin, 100 mg / mL Hygromycin B     | N/A         |
| U2OS FlpIn 6xHis-FLAG SUMO2 WT (This study)           | DMEM, 10% FBS, 1% Penicillin/Streptomycin, 100 mg / mL Hygromycin B     | N/A         |
| U2OS FlpIn 6xHis-FLAG SUMO3 WT (This study)           | DMEM, 10% FBS, 1% Penicillin/Streptomycin, 100 mg / mL Hygromycin B     | N/A         |
| U2OS FlpIn HA-FLAG SUMO4 WT (This study)              | DMEM, 10% FBS, 1% Penicillin/Streptomycin, 100 mg / mL Hygromycin B     | N/A         |
| A427 (ATCC)                                           | EMEM, 10% FBS, 1% Penicillin/Streptomycin, 1% NEAA, 1mM Sodium Pyruvate | CVCL_1055   |
| CALU6 (ATCC)                                          | EMEM, 10% FBS, 1% Penicillin/Streptomycin, 1% NEAA, 1mM Sodium Pyruvate | CVCL_0236   |
| CAL51 (ATCC)                                          | DMEM, 10% FBS, 1% Penicillin/Streptomycin                               | CVCL_1110   |
| HCT116 (ATCC)                                         | DMEM, 10% FBS, 1% Penicillin/Streptomycin                               | CVCL_0291   |
| HEK293 TReX FlpIn (Invitrogen)                        | DMEM, 10% FBS, 1% Penicillin/Streptomycin                               | CVCL_U427   |

**Supplemental Table 6. Chemicals**

| <b>Chemical / Treatment</b>                        | <b>Manufacturer / Product code</b>  | <b>Dosage / Time</b> |
|----------------------------------------------------|-------------------------------------|----------------------|
| Camptothecin (CPT)                                 | Merck 208925                        | 1 $\mu$ M 3 hr       |
| Hydroxyurea (HU)                                   | Merck H8627                         | 5 mM 3 hr            |
| Hydrogen Peroxide (H <sub>2</sub> O <sub>2</sub> ) | Merck 31642                         | 125 $\mu$ M 15 min   |
| Lipopolysaccharide (LPS)                           | Merck L4391                         | 1000 ng/mL 3 hr      |
| MG132                                              | Merck 474787                        | 5 $\mu$ g/ mL 3 hr   |
| CB-5083                                            | Selleck S8101-SEL                   | 100 nM 3 hr          |
| 17-AAG                                             | Cambridge Biosciences 11039-1mg-CAY | 5 $\mu$ M 3 hr       |
| Sorbitol                                           | Merck S1876                         | 500 mM 0.5 hr        |
| ICRF-193                                           | Merck I4659-1MG                     | 100 $\mu$ M 1 hr     |
| Cobalt Chloride (CoCl <sub>2</sub> )               | SLS CHE1618                         | 200 mM 3 hr          |
| Doxycycline                                        | Merck D9891                         | 1 $\mu$ g/ mL 72 hr  |
| Hygromycin B                                       | Invitrogen H044-81VS                | 100 $\mu$ g/ mL      |
| Iodoacetamide (IAA)                                | Merck I1149                         | 200 $\mu$ M          |
| Ionising Radiation                                 | CellRad Irradiator                  | 4 Gy                 |
| ML-792                                             | Selleck S8697                       | 10 $\mu$ M 6 hr      |
| TAK-243                                            | Selleck S8341                       | 10 $\mu$ M 6 hr      |
| MLN4924                                            | Selleck S7109                       | 10 $\mu$ M 6 hr      |

## Uncropped membranes



Figure 1b

0.5 min

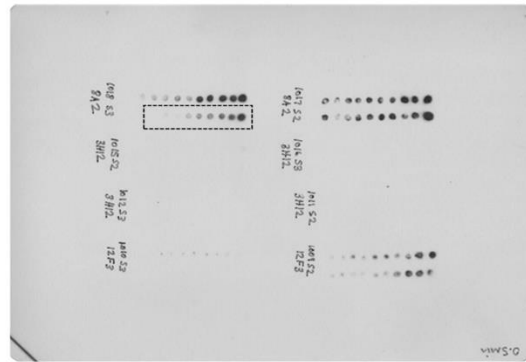

1 min

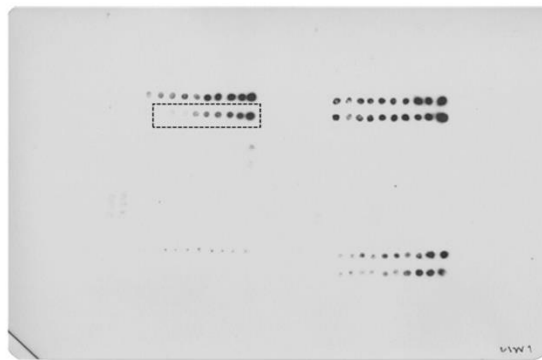

2 min

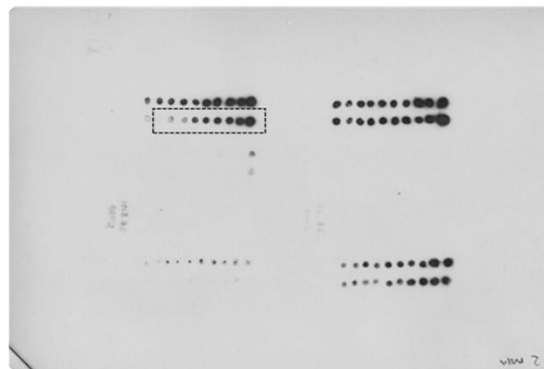

10 min

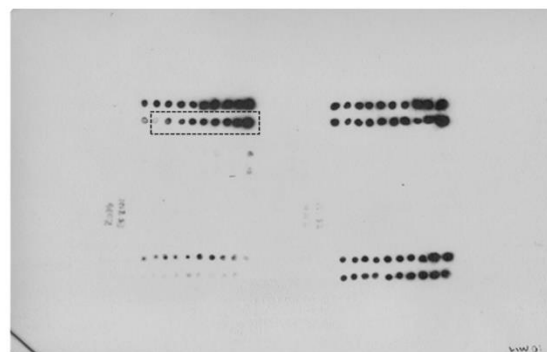

Figure 2a

EP298, C9H1, BD8B16, 21C7

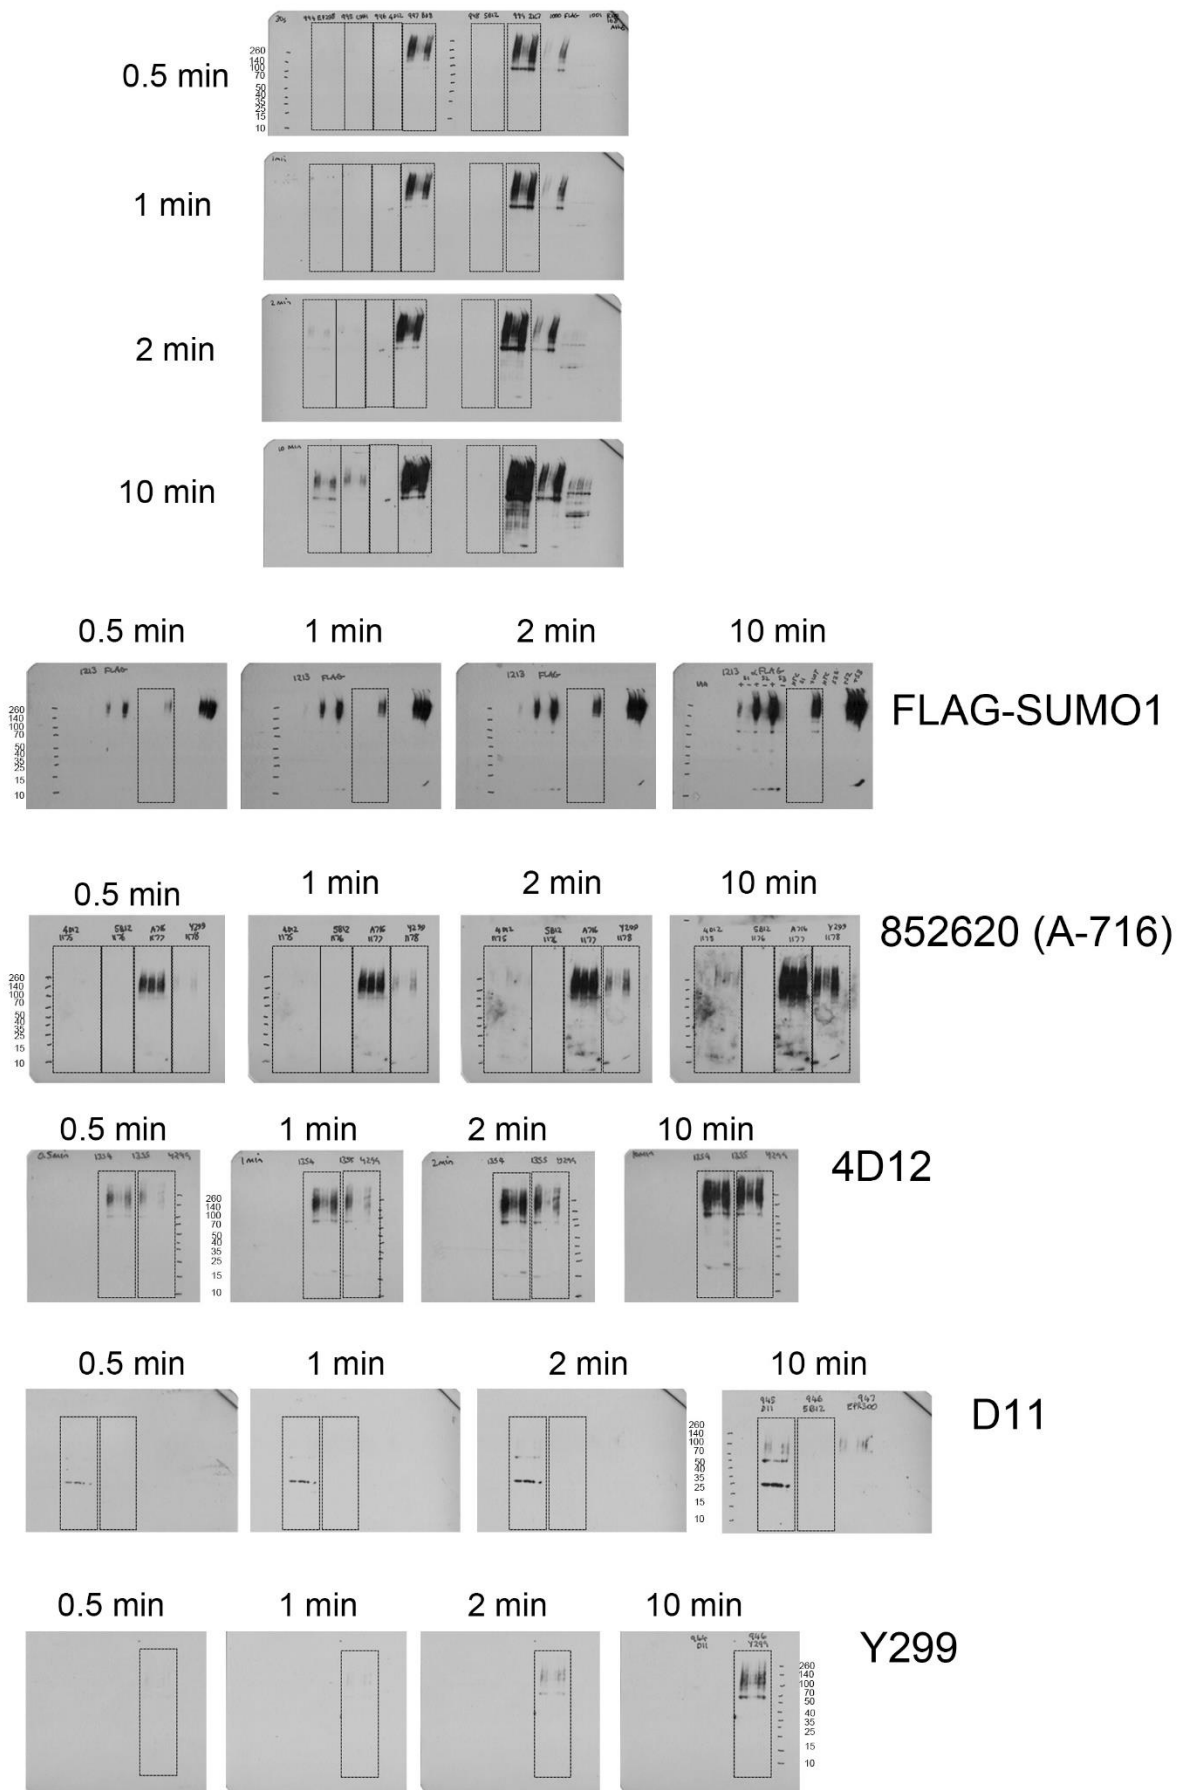

Figure 2c

FLAG SUMO2 and FLAG SUMO3

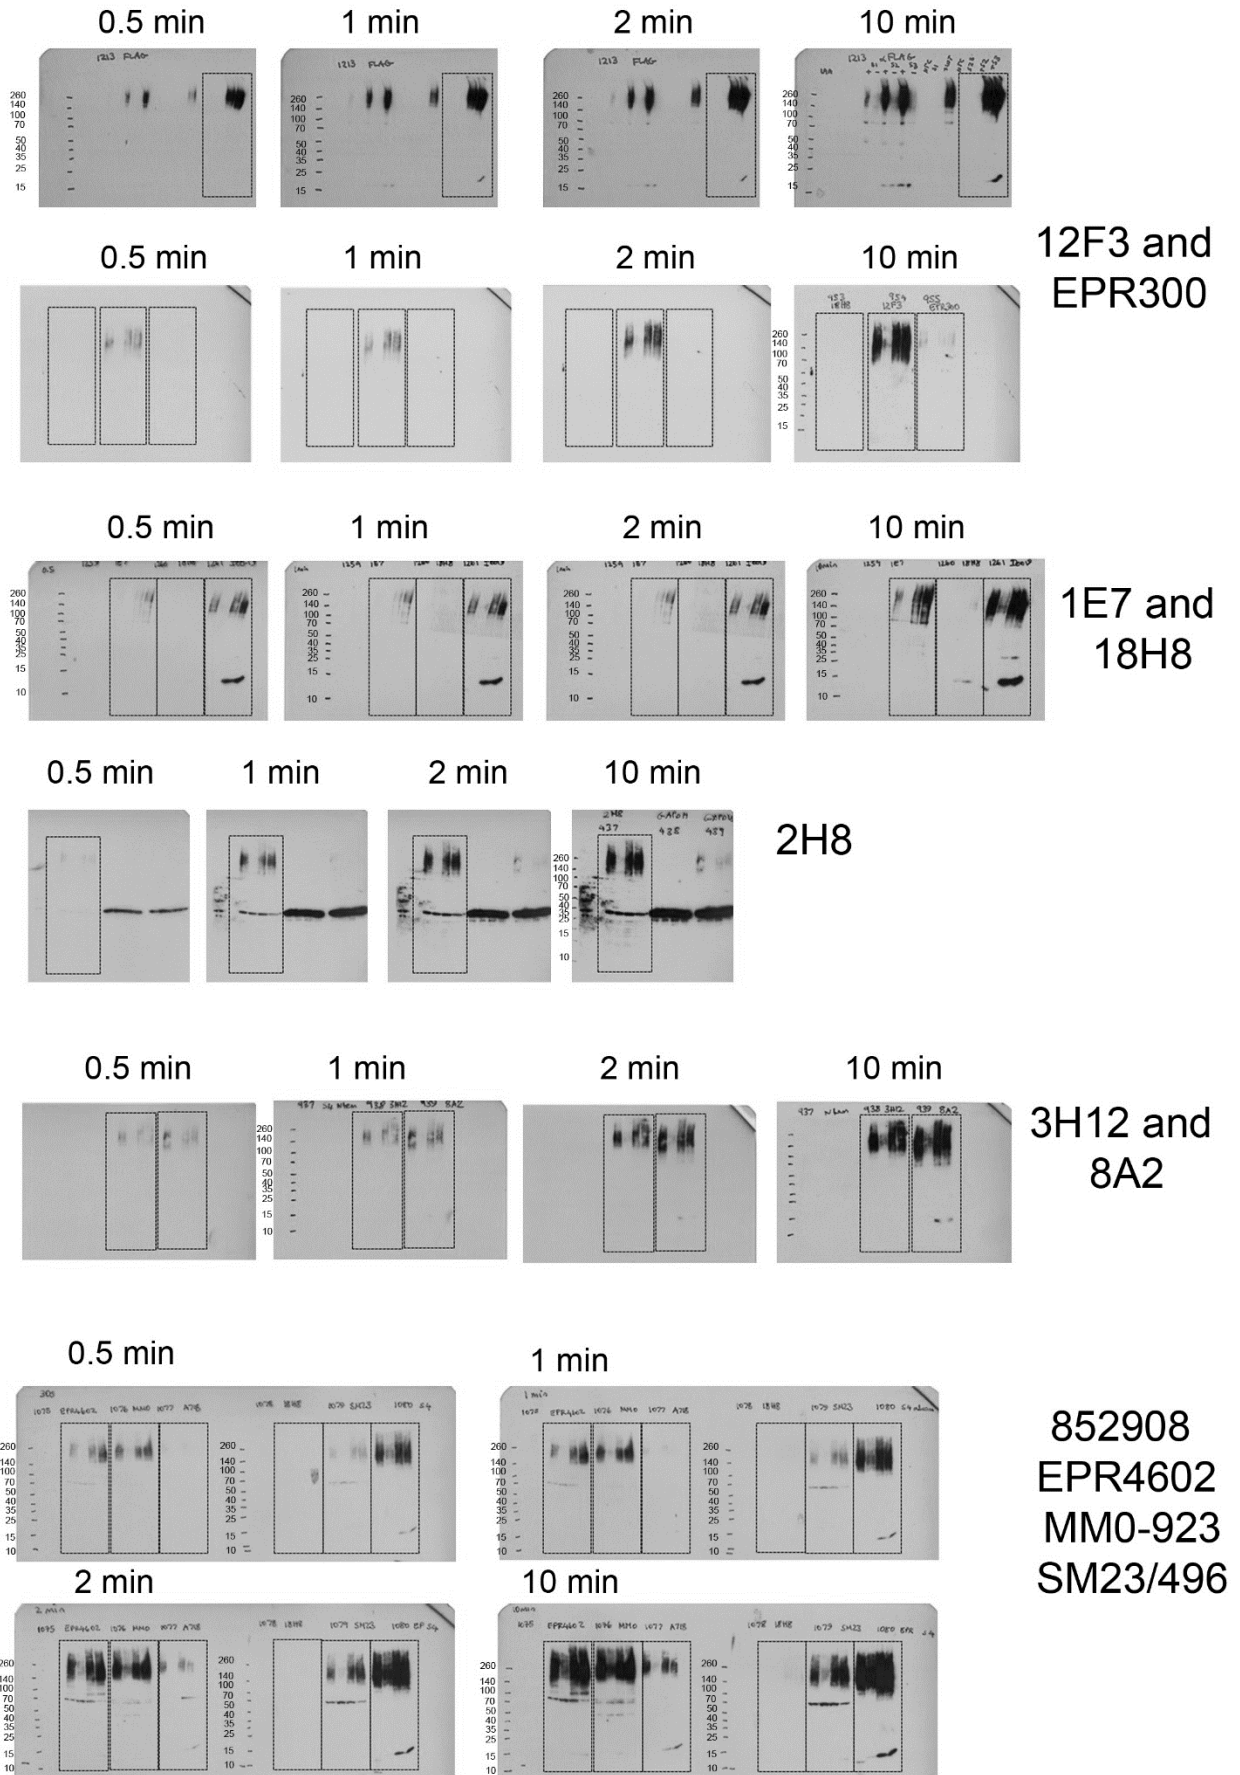

Figure 2e

### EPR7163

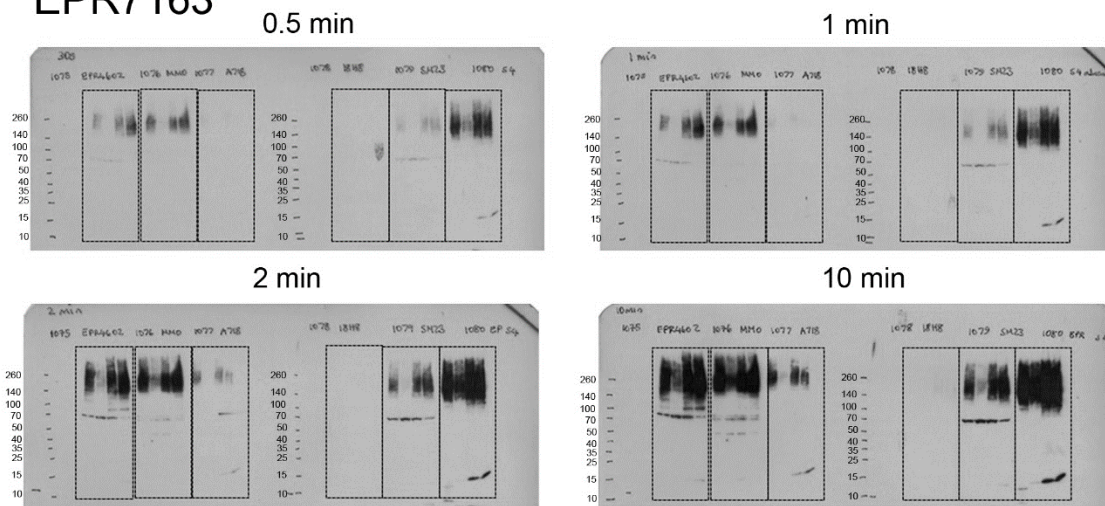

### ARC1382 and JJ-085

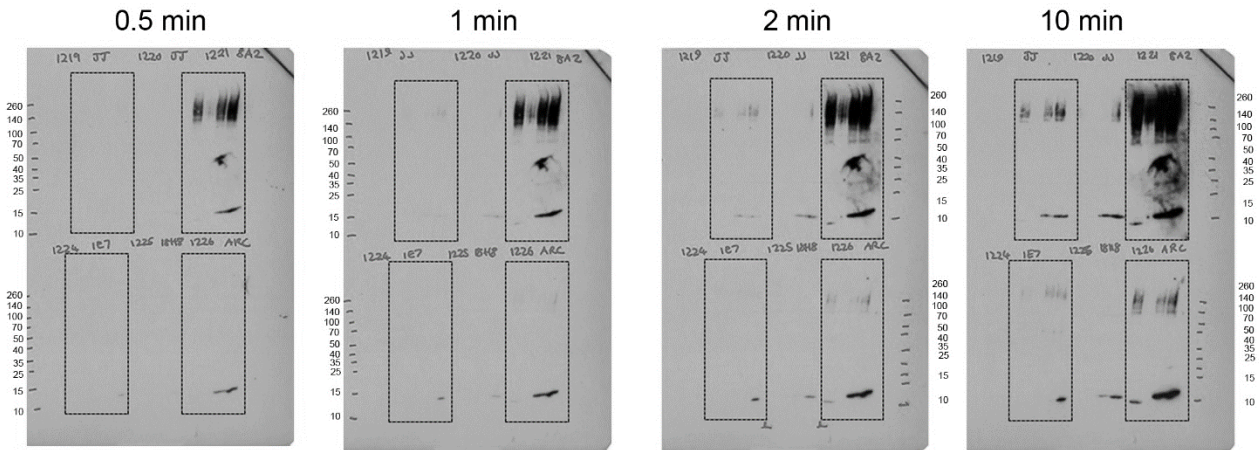

### 100-19

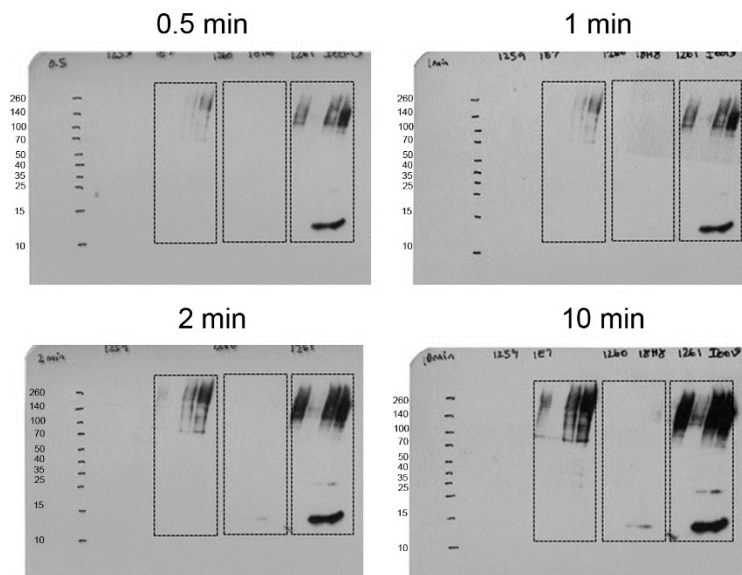



Figure 3b

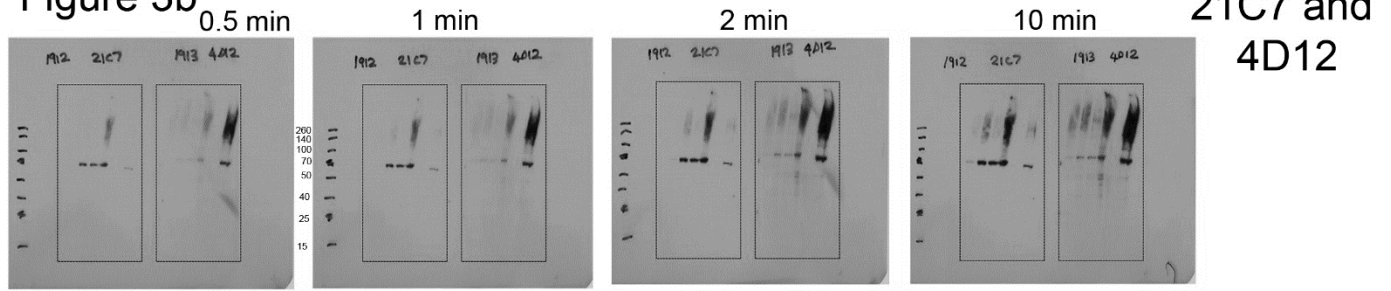

852620, BD8B16, Y299, 3H12, ARC1382, JJ-085, EP298, C9H1

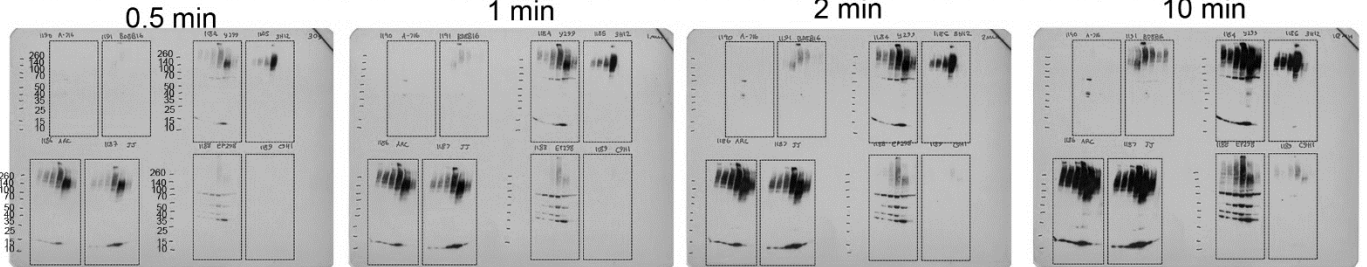

0.5 min 1 min 2 min 10 min 1E7, D11, 12F3 and 8A2

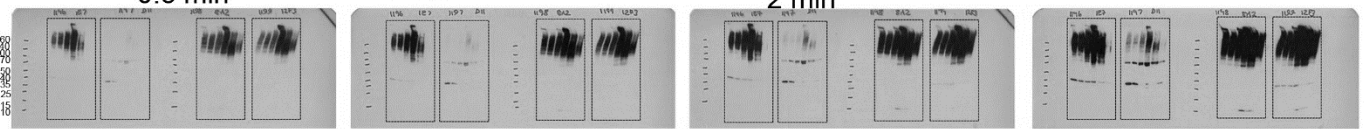

SM23/496, MM0-923, 2H8 and 18H8

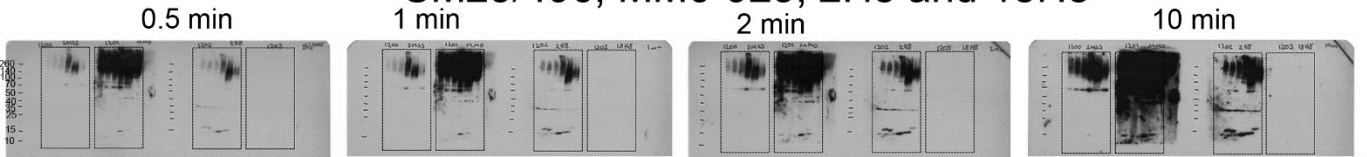

MM0-923 852908 and EPR300 EPR4602 and EPR7163

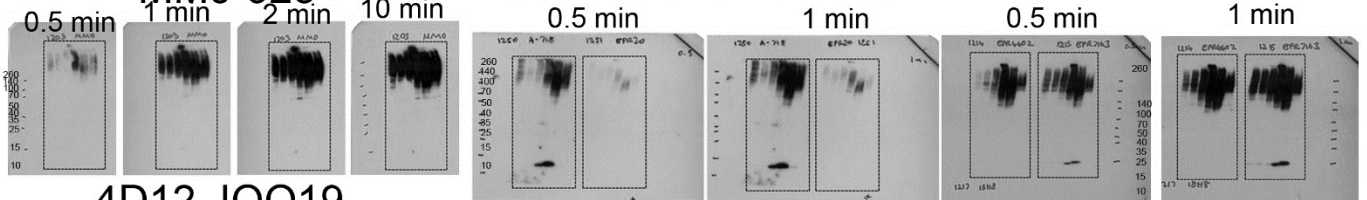

4D12, IOO19,

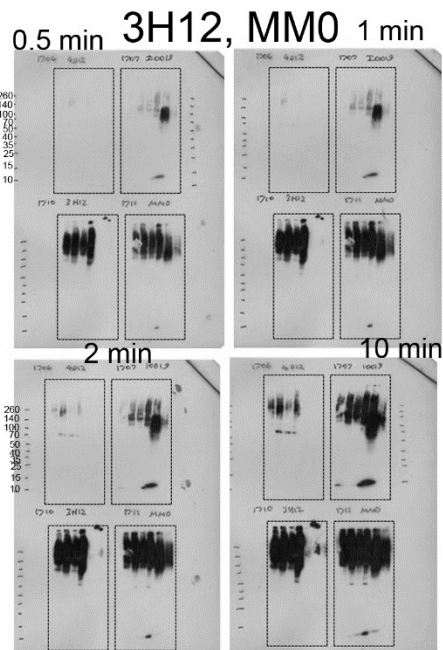

3H12, SM23/496, MM0-923, 2H8

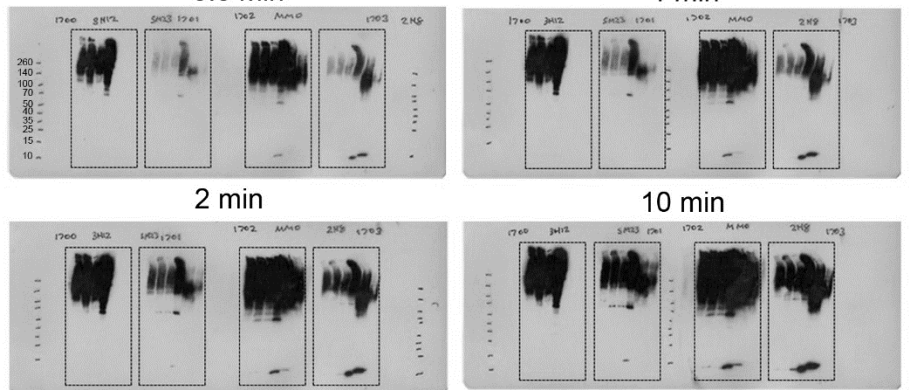

Figure 3c

12F3, 1E7, 2H8, 3H12, 8A2, 18H8, 852908, EPR300, EPR4602, MM0, SM23

ARC1382, EPR7163, IOO-19, JJ-085

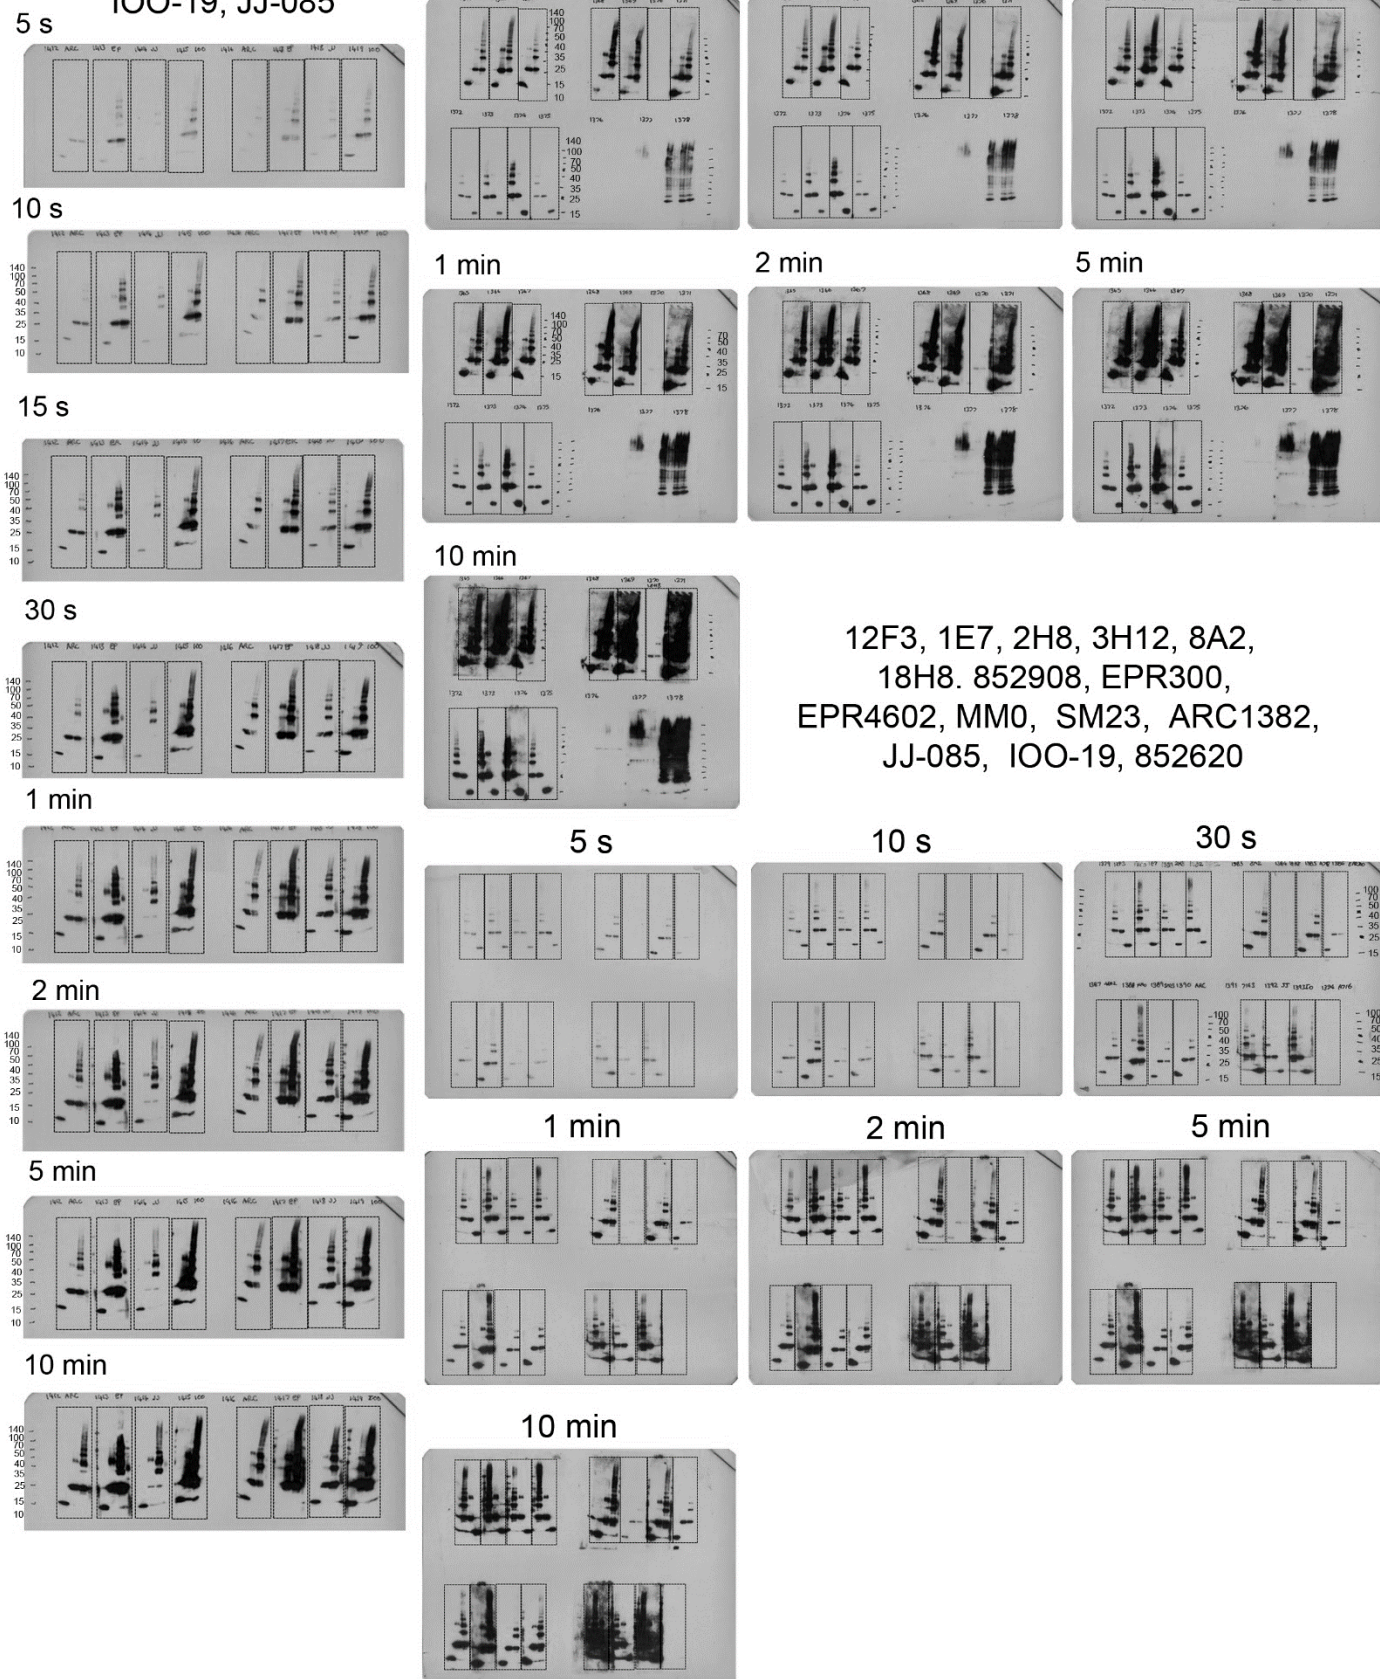



Figure 3e

FLAG-SUMO1

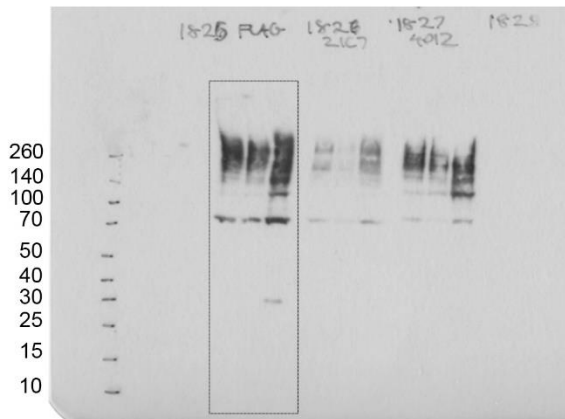

FLAG-SUMO2

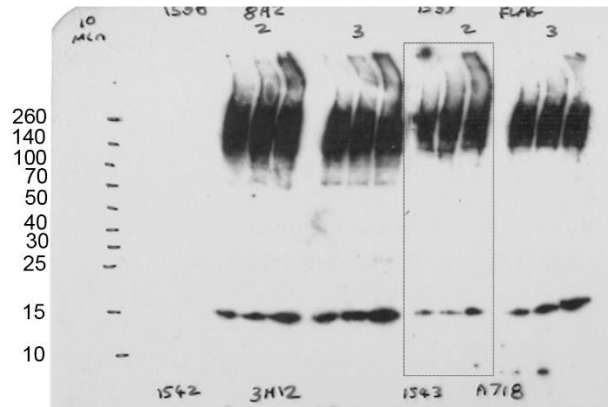

RNF4

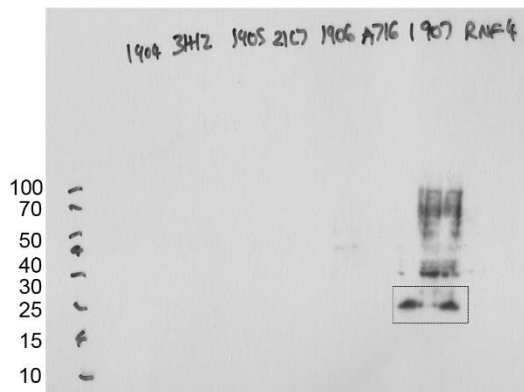

SENP6

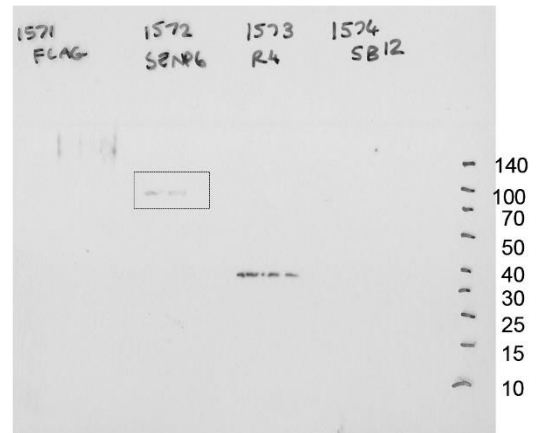

GAPDH

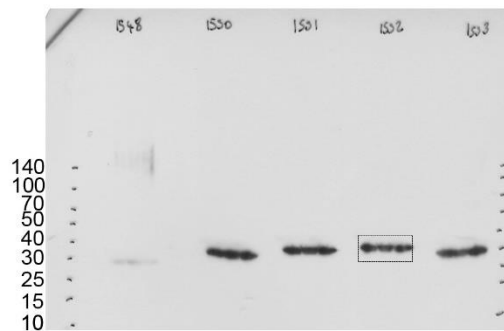

**Figure 3f**  
8A2, FLAG, MM0, SM23

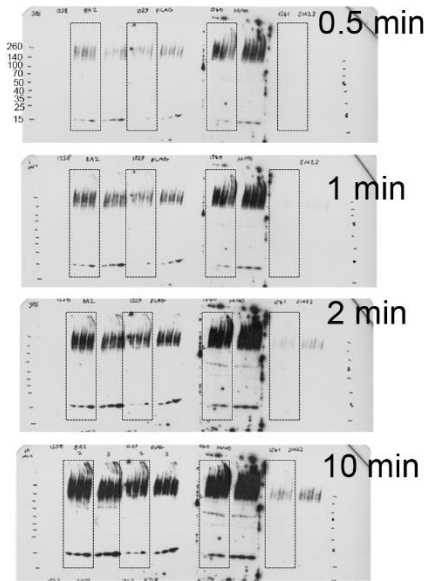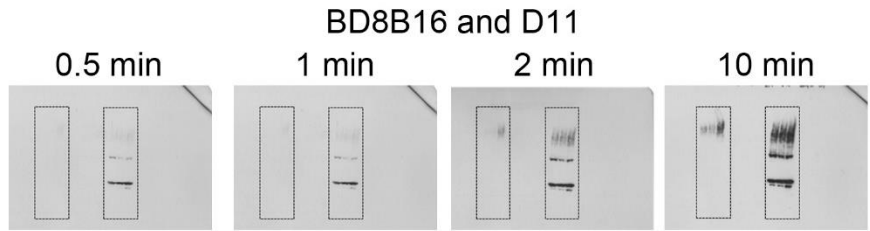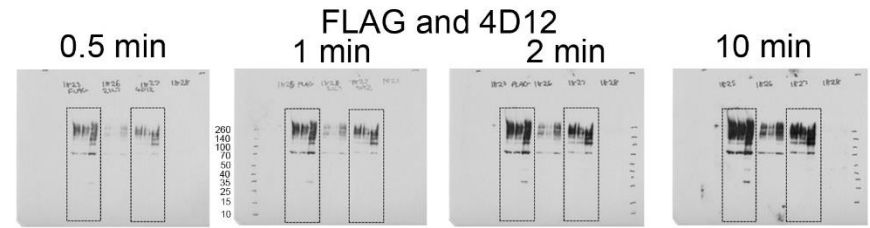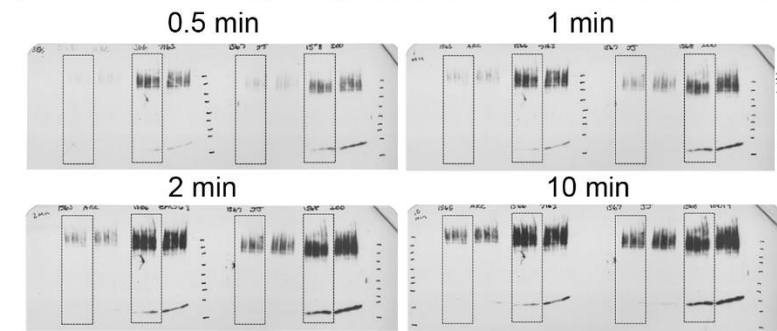

ARC1382,  
EPR7163,  
JJ-085 and  
IOO-19

**MM0 and 852908**

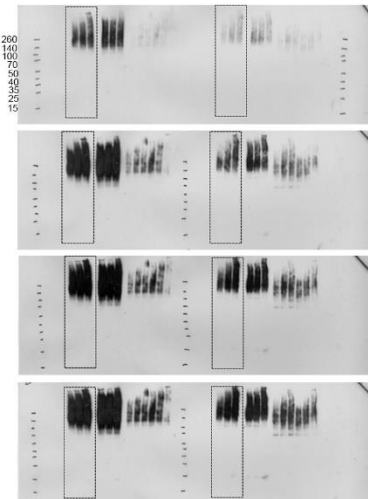

**1E7, 18H8, 2H8, 852908, EPR300, EPR4602**

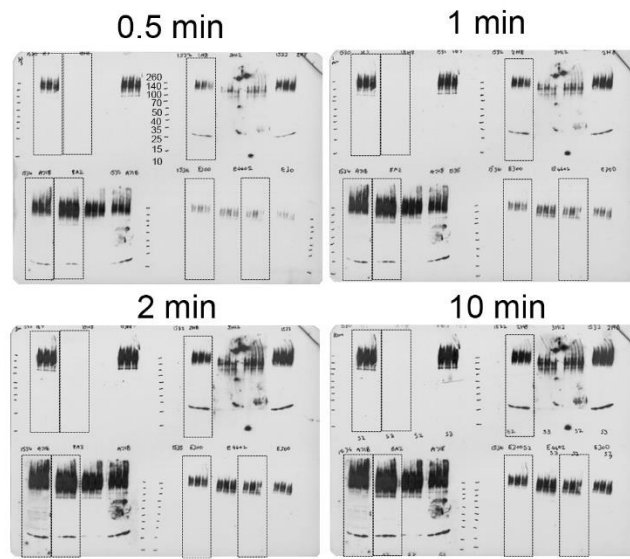

**21C7, 4D12, 5B12, BD8B16, C9H1, EP298, Y299, D11**

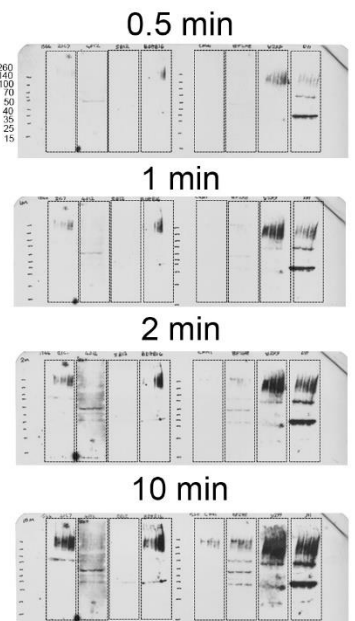

**3H12, 852908, 12F3 and 1E7**

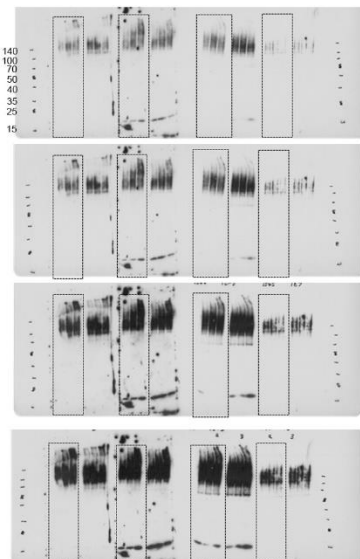

**C9H1 and EP298**

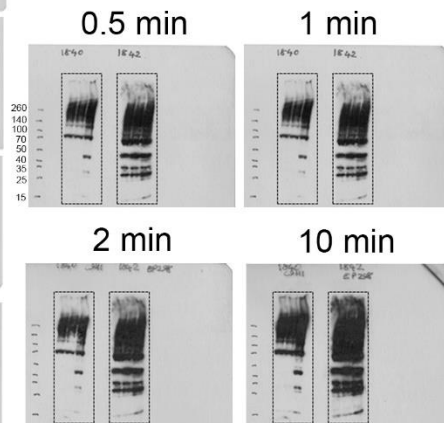

**FLAG and 1E7**

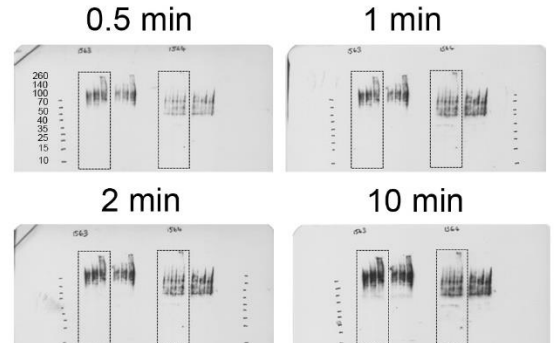

Figure 4a

GAPDH

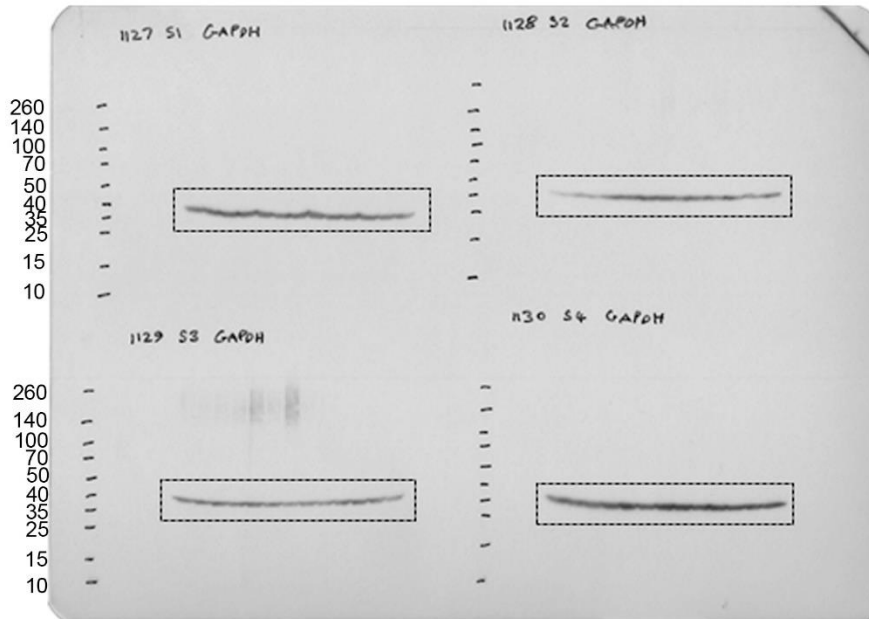

FLAG SUMO1

FLAG SUMO2

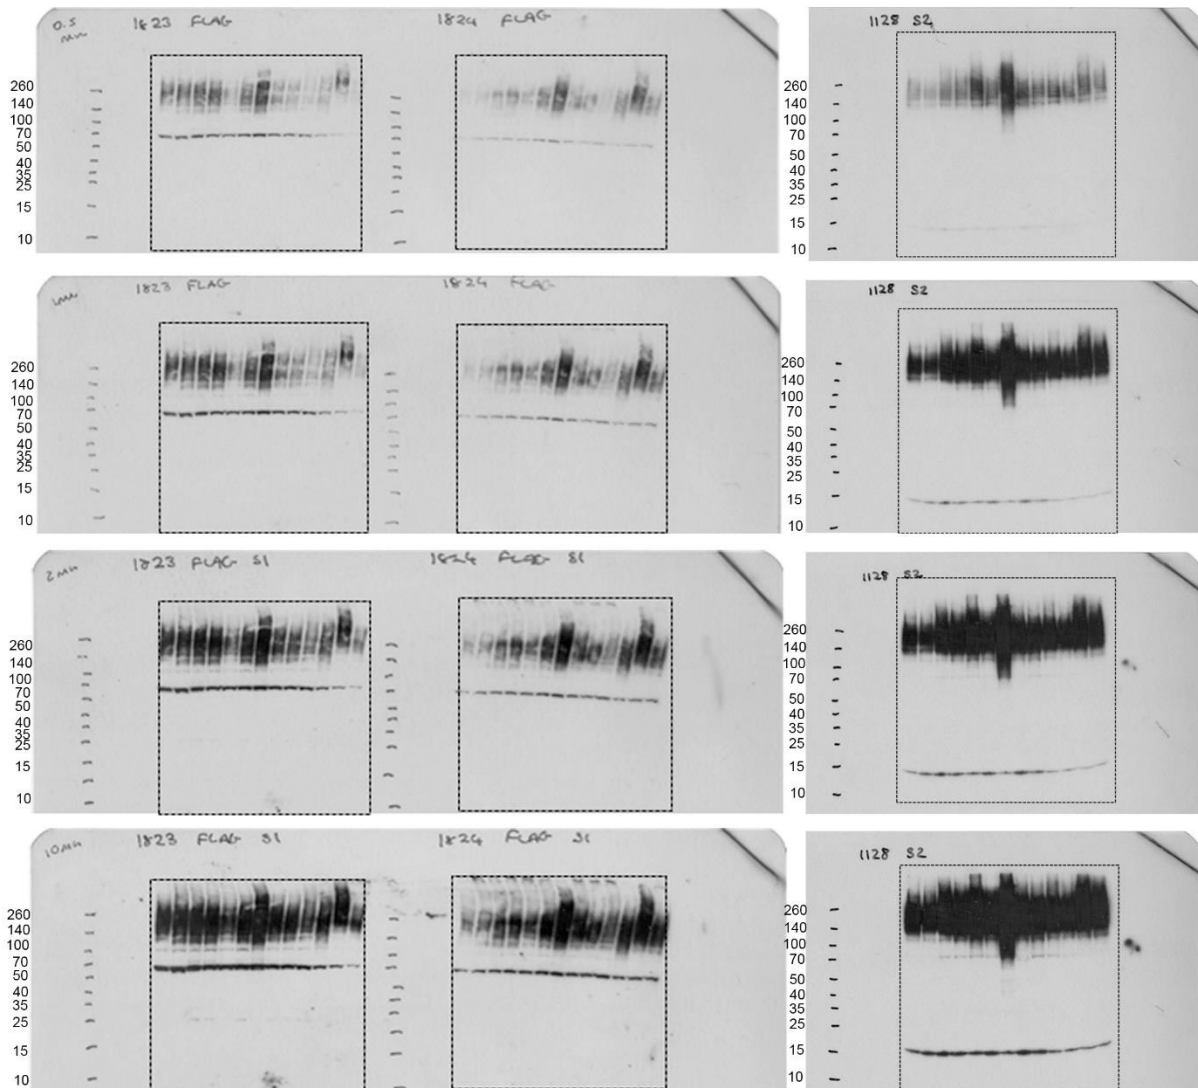

Figure 4b

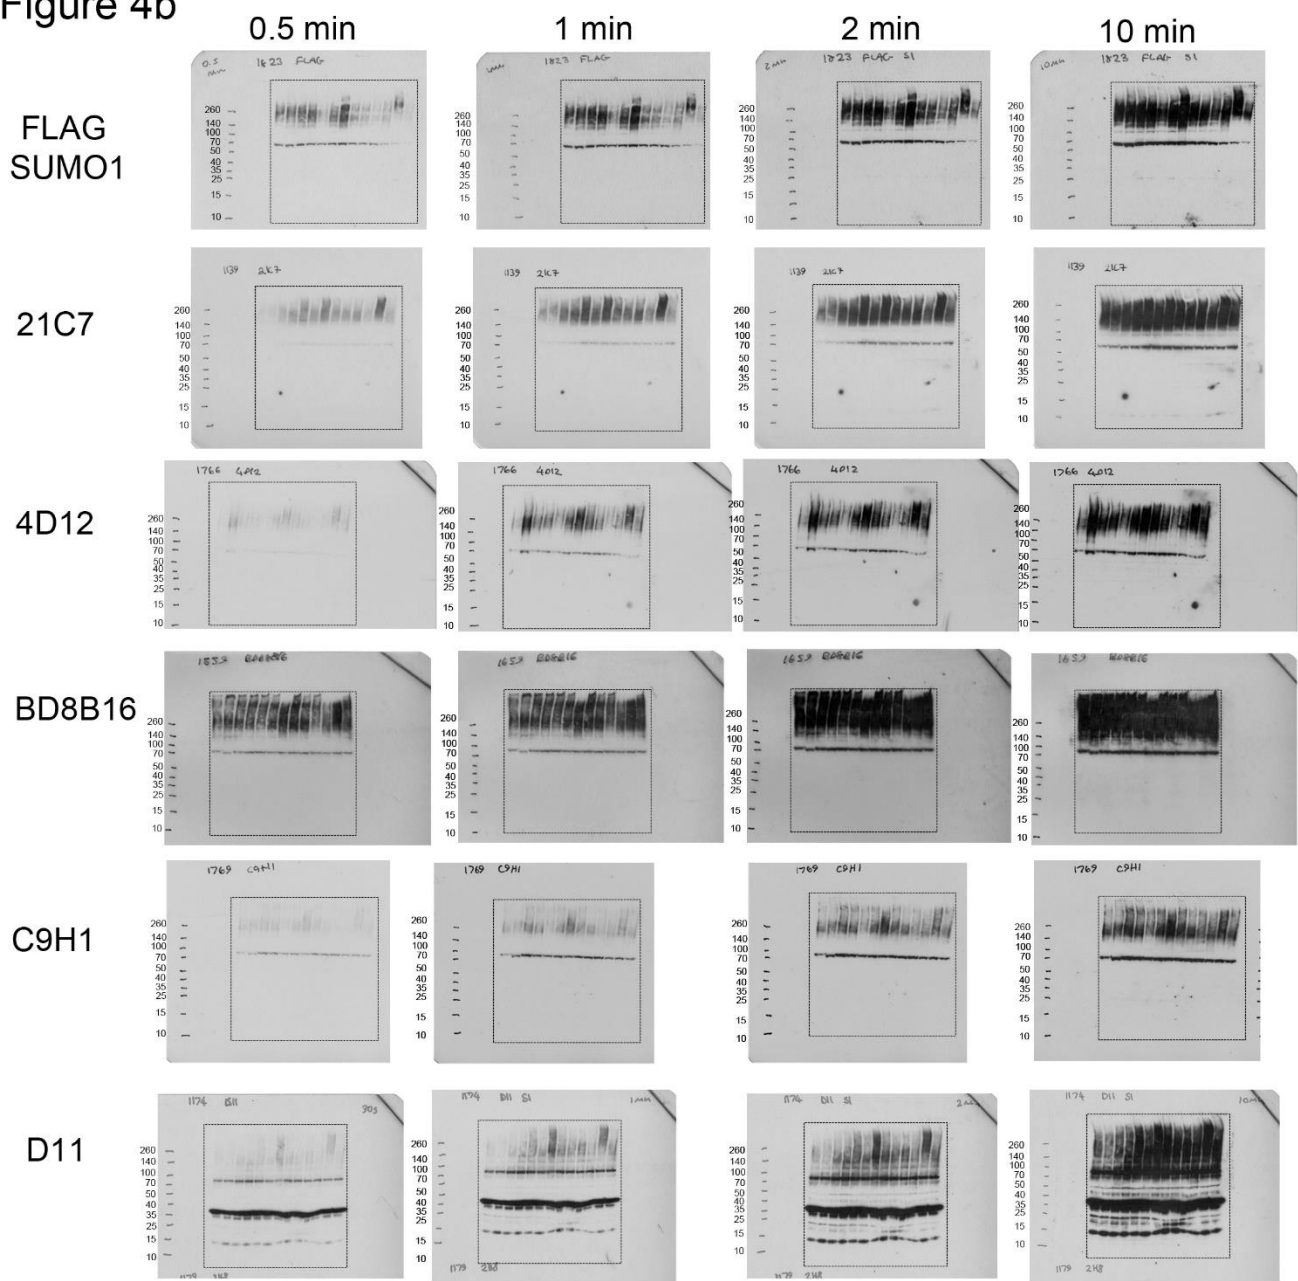

EP298 and Y299

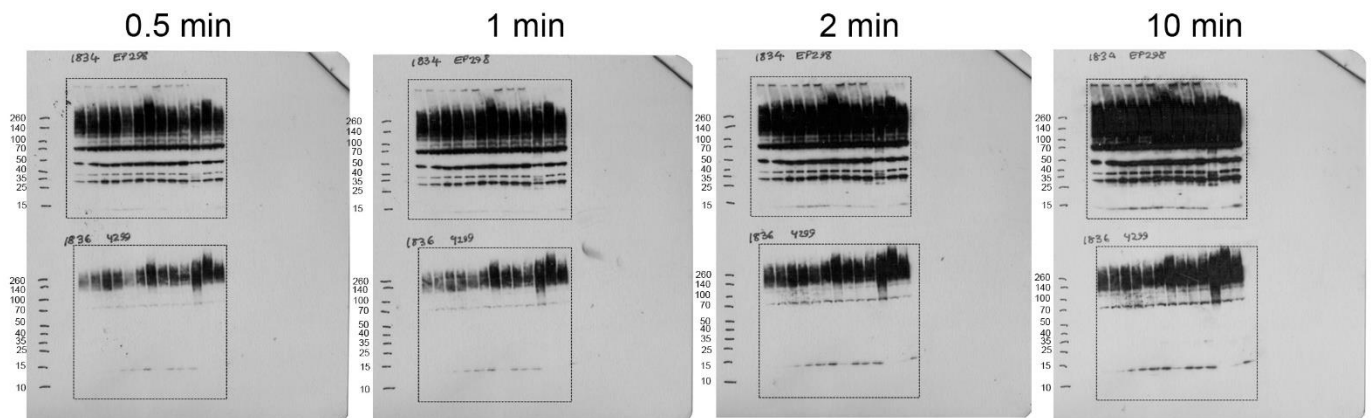

Figure 4b

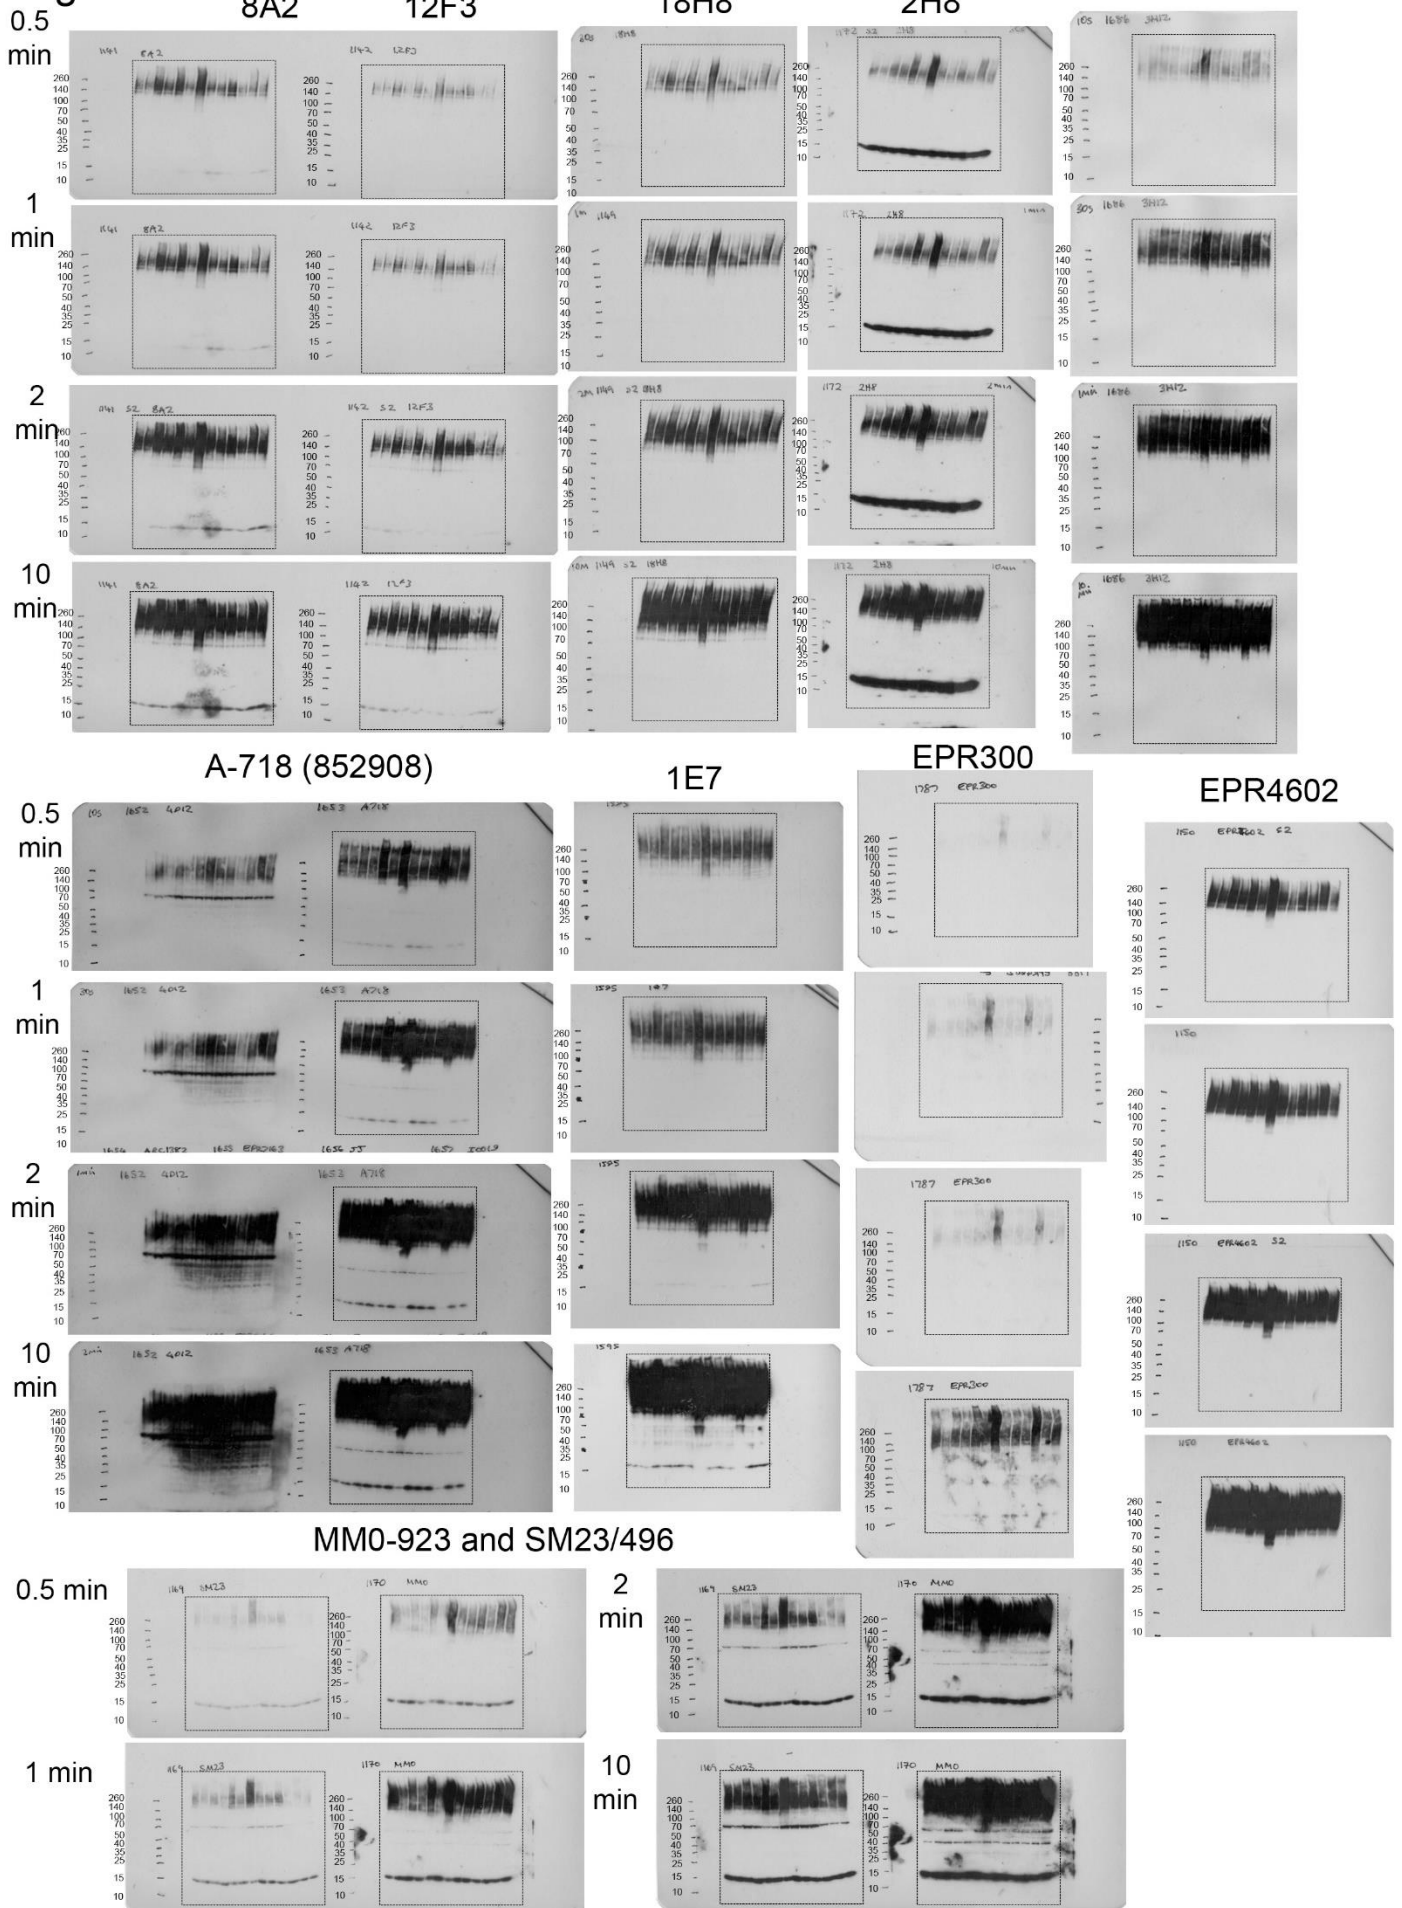

Figure 4d

FLAG-HA SUMO4 and ARC1382

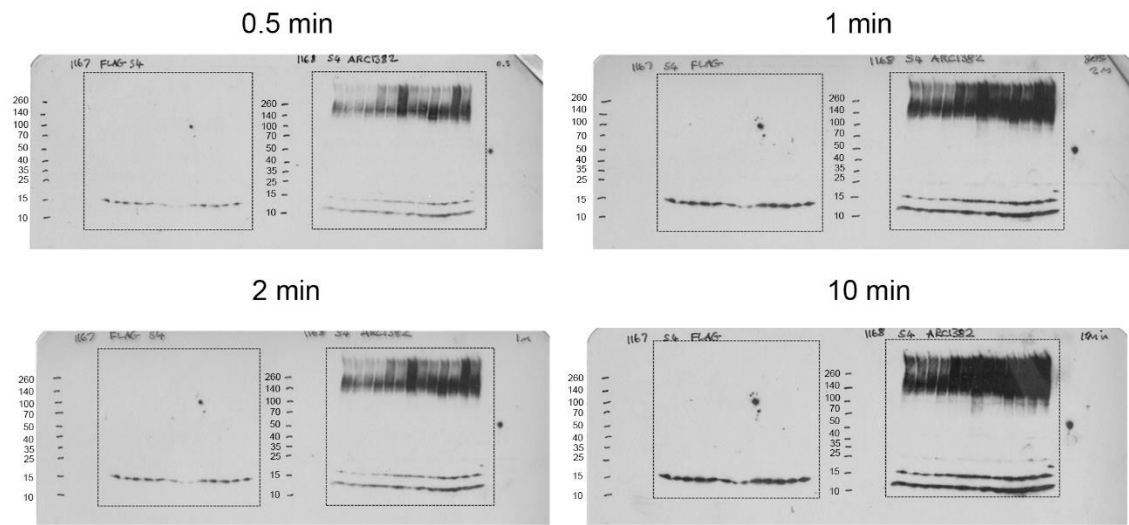

EPR7163

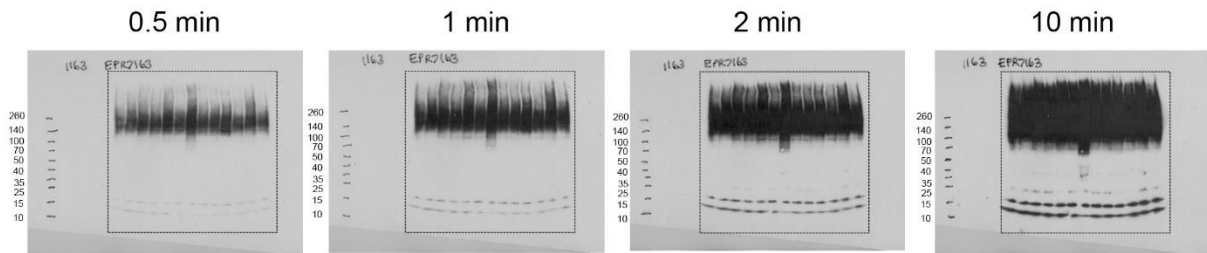

IOO-19

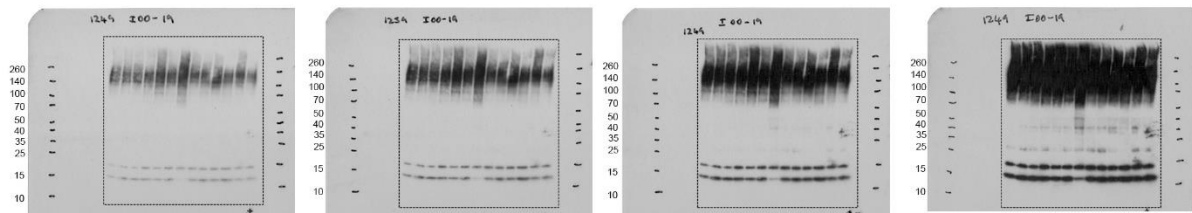

JJ-085

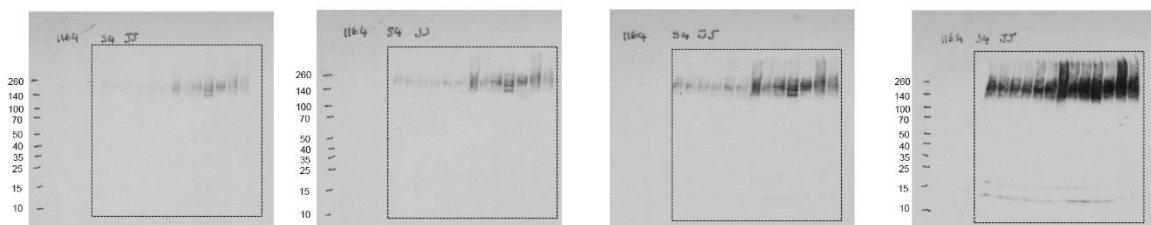

# Figure 6

6a

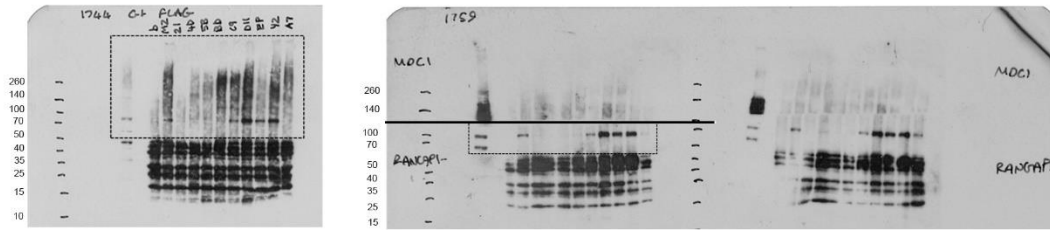

6d

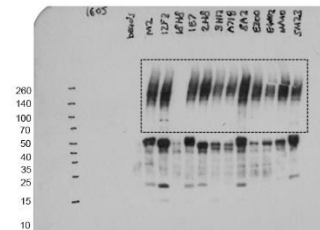

6f

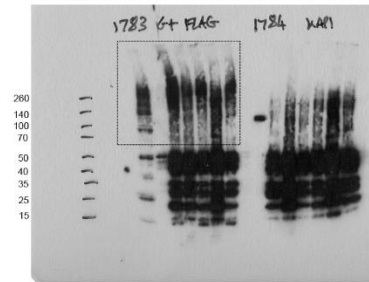

6g

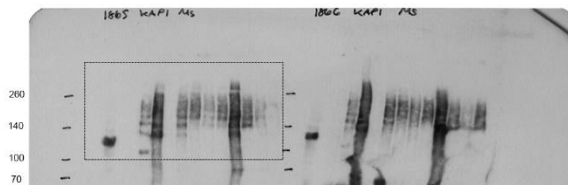



Supplemental Figure 2

2b

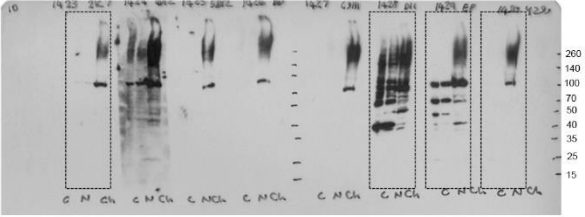

2c Y299 852620 NEDD8 Ubiquitin

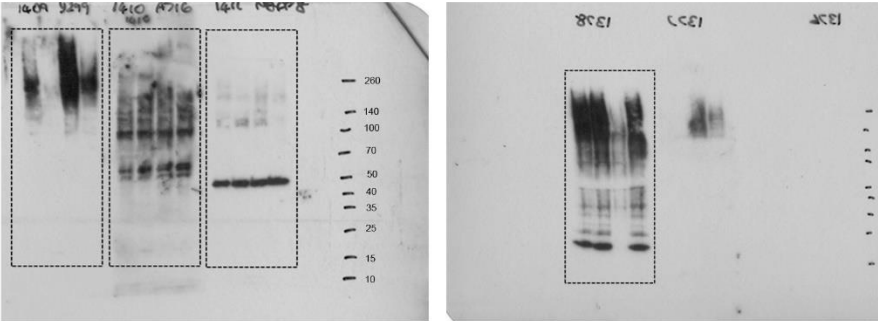

GAPDH

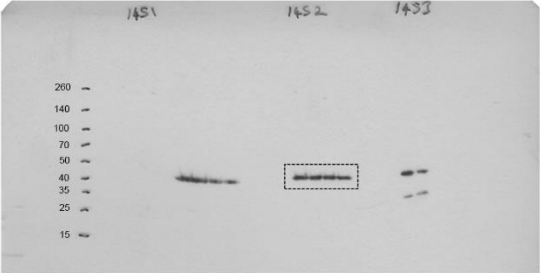



# Supplemental Figure 2

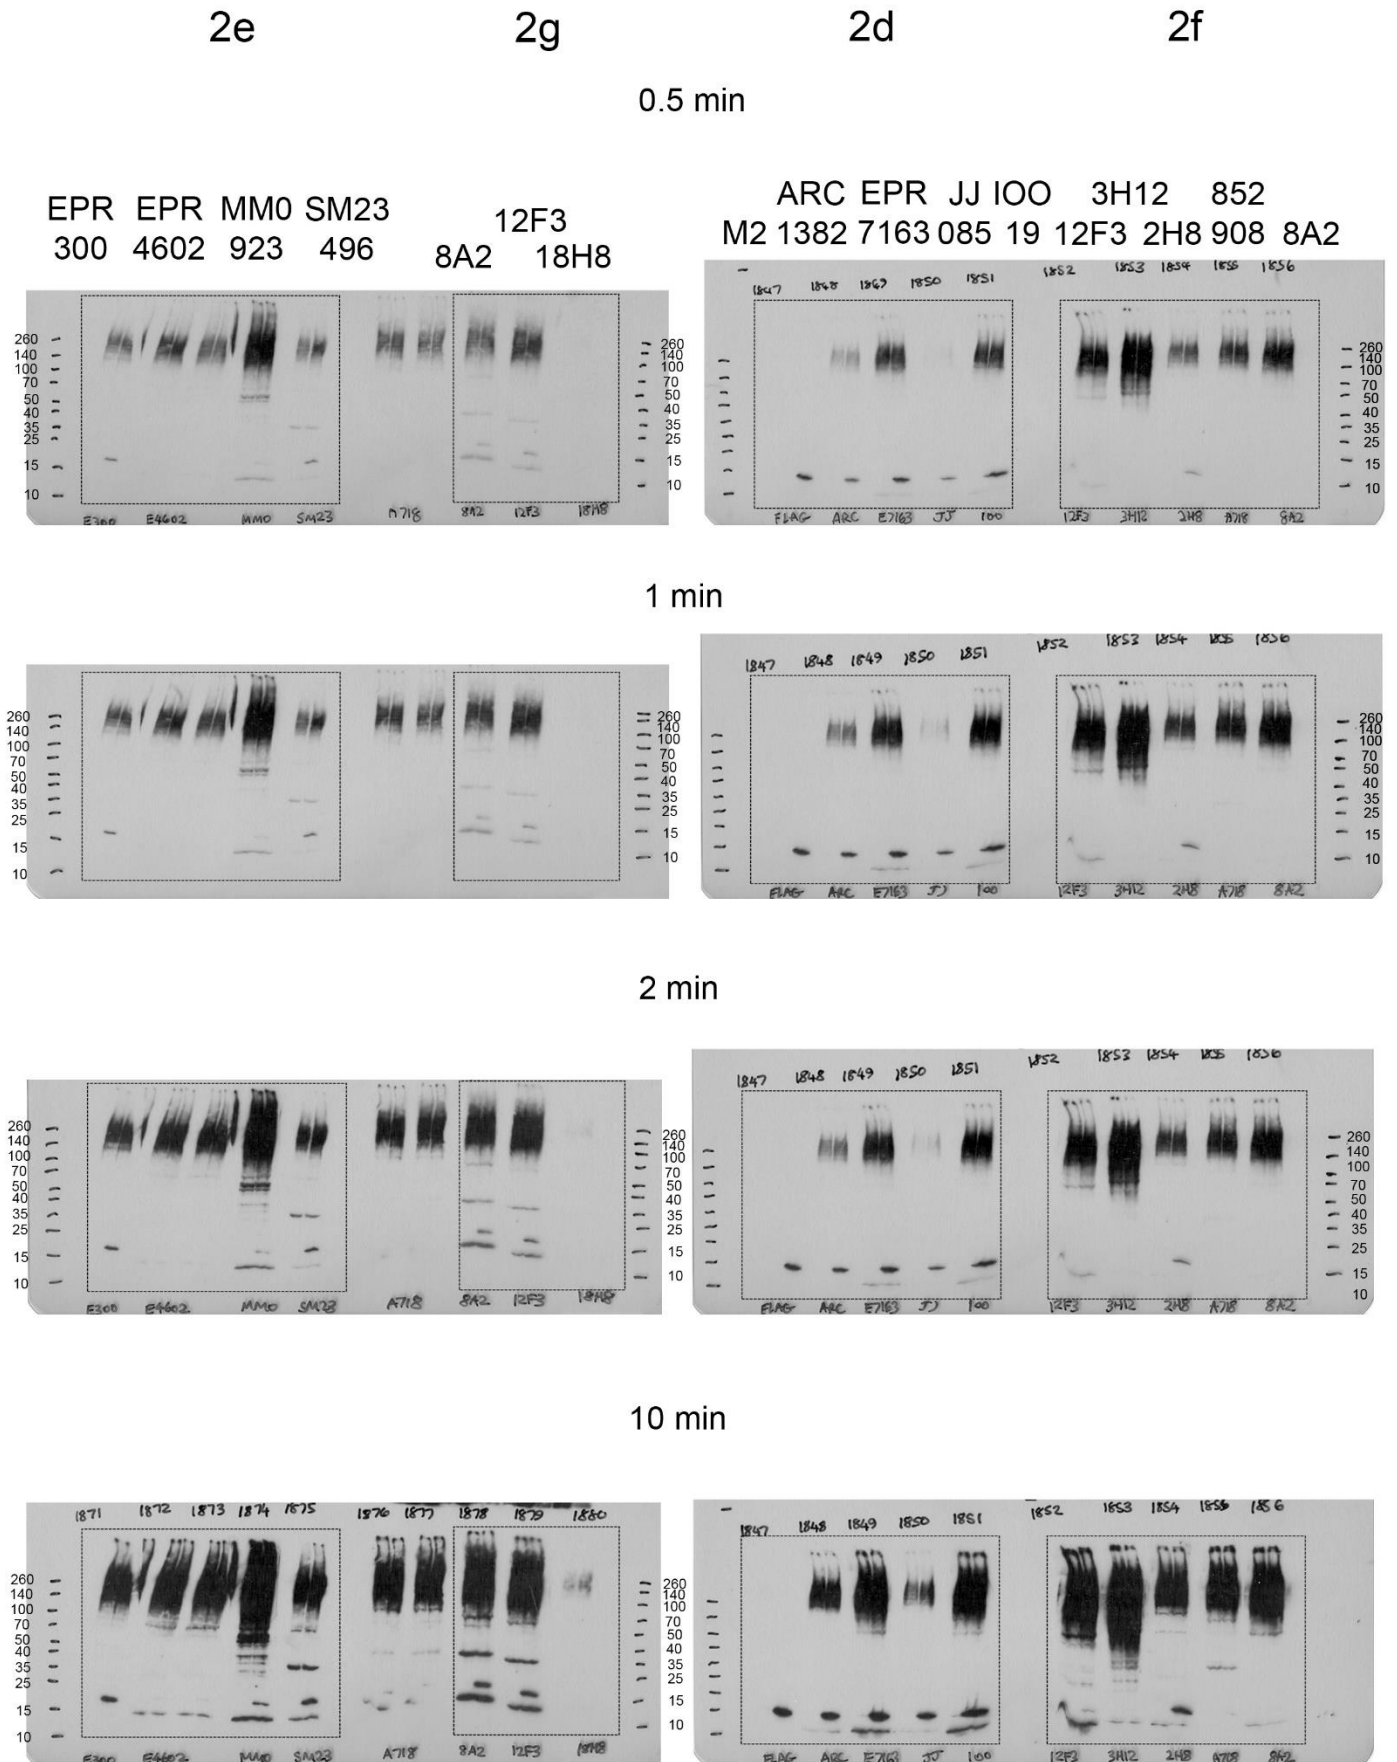

Representative immunoblots to demonstrate lack of SUMO1 detection by MAb 5B12.

Related to figure 2a - parallel membranes from the same lysates, gel and transfer were cut and probed with 5B12, D11, FLAG or Y299 MAbs.

Related to figure 4b 5B12 failed to detect changes in SUMO1 conjugates after stress. Note the signal from the same lysates probed in parallel with D11.

## 5B12 WB

### Related to Figure 2a

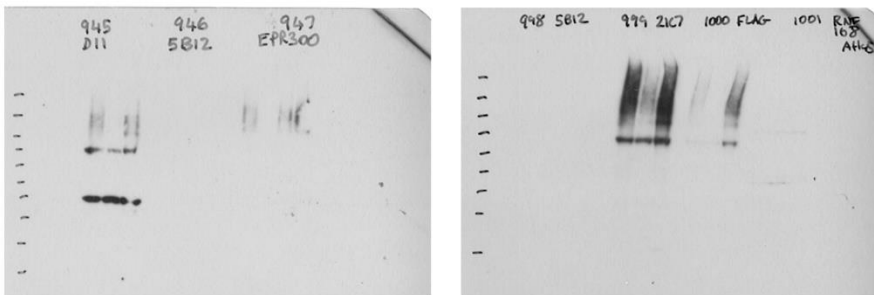

### Related to Figure 4b

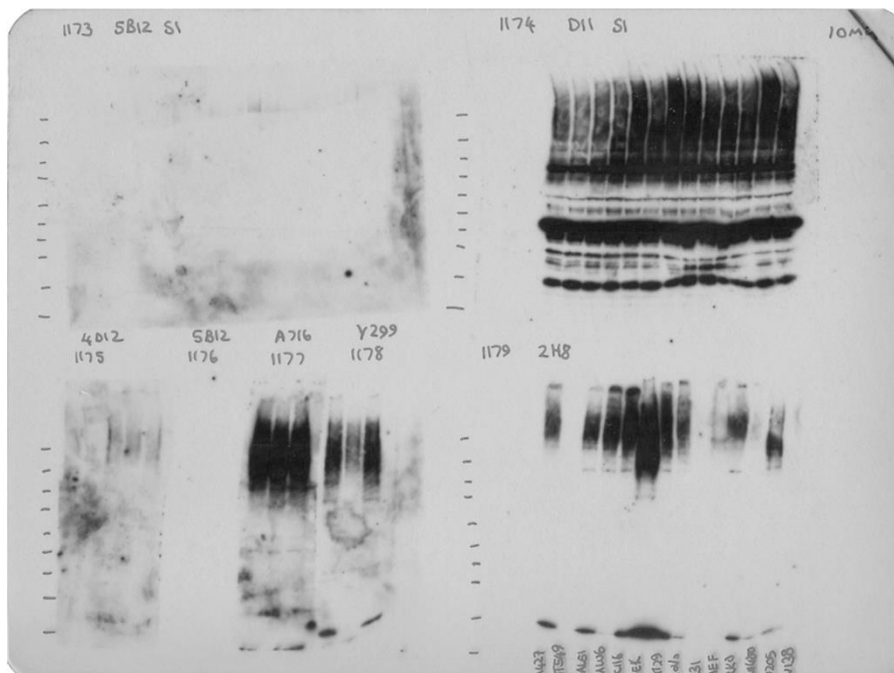

Supplement: 41598_2022_25665_MOESM1_ESM.pdf [file 41598_2022_25665_MOESM1_ESM.pdf]
